# Extended Effects of a Wearable Sensory Prosthesis on Gait, Balance Function and Falls After 26 Weeks of Use in Persons with Peripheral Neuropathy and High Fall Risk – The walk2Wellness Trial

Lars IE Oddsson<sup>1,2,3</sup>, Teresa Bisson<sup>2,4</sup>, Helen S Cohen<sup>5</sup>, Ikechukwu Iloputaife<sup>6</sup>, Laura Jacobs<sup>1</sup>, Doris Kung<sup>5</sup>, Lewis A Lipsitz<sup>6,7,8</sup>, Brad Manor<sup>6,7,8</sup>, Patricia McCracken<sup>9</sup>, Yvonne Rumsey<sup>1</sup>, Diane M Wrisley<sup>10</sup>, Sara R Koehler-McNicholas<sup>2,9</sup>.

<sup>1</sup> RxFunction Inc. MN, USA;

<sup>2</sup> University of Minnesota, MN, USA;

<sup>3</sup> Ben Gurion University of the Negev, Israel;

<sup>4</sup> M Health Fairview, Minneapolis, MN, USA;

<sup>5</sup> Baylor College of Medicine, Houston, TX, USA;

<sup>6</sup> Hinda and Arthur Marcus Institute for Aging Research, Hebrew SeniorLife, Roslindale, MA, USA.

<sup>7</sup> Division of Gerontology, Beth Israel Deaconess Medical Center, Boston, MA, USA;

<sup>8</sup> Harvard Medical School, Boston, MA, USA;

<sup>9</sup> Minneapolis Department of Veterans Affairs Health Care System, Minneapolis, MN, USA;

<sup>10</sup> College of St Mary, Omaha, NE, USA;

**Keywords:** Peripheral Neuropathy, Falls, Balance, Gait Speed, Neuromodulation, Clinical Trial, Sensory Prosthesis, Non-invasive, Wearable

## Abstract

**Background:** We recently reported that individuals with impaired plantar sensation and high fall risk due to sensory peripheral neuropathy (PN) improved gait and balance function following 10 weeks of use of Walkasins<sup>®</sup>, a wearable lower limb sensory prosthesis that provides directional tactile stimuli related to plantar pressure measurements during standing and walking (RxFunction Inc., MN, USA). Here, we report 26-week outcomes and compare pre- and in-study fall rates. We expected improvements in outcomes and reduced fall rates reported after 10 weeks of use to be sustained.

**Methods:** Participants had clinically diagnosed PN with impaired plantar sensation, high fall risk (Functional Gait Assessment, FGA score <23) and ability to sense tactile stimuli above the ankle at the location of the device. Additional outcomes included 10m Gait Speed, Timed Up&Go (TUG), Four-Stage Balance Test, and self-reported outcomes, including Activities-Specific Balance Confidence scale and Vestibular Disorders Activities of Daily Living Scale. Participants tracked falls using a calendar.

**Results:** We assessed falls and self-reported outcomes from 44 individuals after 26 weeks of device use; 30 of them conducted in-person testing of clinical outcomes. Overall, improvements in clinical outcomes seen at 10 weeks of use remained sustained at 26 weeks with statistically significant increases compared to baseline seen in FGA scores (from 15.0 to 19.2), self-selected gait speed (from 0.89 m/s to 0.97 m/s), and 4-Stage Balance Test (from 25.6s to 28.4s), indicating a decrease in fall risk. Non-significant improvements were observed in TUG and fast gait speed. Overall, 39 falls were reported; 31 of them did not require medical treatment and four caused severe injury. Participants who reported falls over 6 months prior to the study had a 43% decrease in fall rate during the study as compared to self-report 6-month pre-study (11.8 vs. 6.7 falls/1000 patient days, respectively,  $p < 0.004$ ), similar to the 46% decrease reported after 10 weeks of use.

**Conclusion:** A wearable sensory prosthesis can improve outcomes of gait and balance function and substantially decreases incidence of falls during long-term use. The sustained long-term benefits in clinical outcomes reported here lessen the likelihood that improvements are placebo effects.

**Trial registration:** ClinicalTrials.gov (#NCT03538756)

## 50 1 Introduction

51 Persistent problems with gait and balance function may lead to falls, fractures, and other serious  
52 injuries in older adults (Bergen, Stevens et al. 2016, Ganz and Latham 2020, Moreland, Kakara et al.  
53 2020). In fact, clinical observations on the problem of falls and fall prevention go back to at least  
54 1948 when Sheldon (Sheldon 1948) presented data in *The Lancet* on “Liability to Falls” in older  
55 adults, concluding that falling was “a clinical problem which has never received the attention it  
56 deserves.” Today, we appreciate that causes of falls are complex and require a multifactorial clinical  
57 approach to arrive at a correct diagnosis and to provide specific and relevant therapeutic interventions  
58 (Cohen, Miller et al. 2015).

59  
60 To address the problem of falls in older adults, various clinical practice guidelines for falls  
61 prevention and management have been developed (Montero-Odasso, Kamkar et al. 2021). The  
62 Centers for Disease Control and Prevention (CDC), for example, has established “STEADI”  
63 (STEADI 2021), an evidence-based initiative to address fall prevention based on a curation of  
64 decades of research activities (Stevens and Phelan 2013). At this time, advice provided through the  
65 STEADI initiative includes “Talk to your doctor”; “Do Strength and Balance Exercises”; “Have Your  
66 Eyes Checked”; and “Make Your Home Safer”(CDC 2021). At a minimum, health care providers  
67 should screen their patients for fall risk, including older adults and individuals with  
68 neurodegenerative diseases that affect balance function. Simple interventions that should be  
69 considered to help reduce the risk for falls include medication management and vitamin D  
70 supplements to improve bone, muscle, and nerve health (Bergen, Stevens et al. 2016). Further  
71 treatment of gait and balance issues may involve use of canes, walkers, and rehabilitation  
72 interventions with balance exercises (Richardson, Sandman et al. 2001, Halvarsson, Franzén et al.  
73 2013, Melzer and Oddsson 2013, Ganz and Latham 2020), including Tai-Chi (Li and Manor 2010,  
74 Manor, Lough et al. 2014, Quigley, Bulat et al. 2014). Any functional benefits related to fall rates  
75 and gait function after long-term use of bilateral ankle foot orthoses appear limited (Wang, Goel et al.  
76 2019).

77  
78 In addition to other age-related risk factors, sensory peripheral neuropathy (PN), leading to impaired  
79 plantar sensation, is an independent risk factor for falls (Richardson and Hurvitz 1995, Koski,  
80 Luukinen et al. 1998, Reeves, Orlando et al. 2021), irrespective of whether the underlying cause is  
81 due to diabetes (Mustapa, Justine et al. 2016, Vinik, Camacho et al. 2017), chemotherapy (Winters-  
82 Stone, Horak et al. 2017), or an unknown factor (Riskowski, Quach et al. 2012). The prevalence of  
83 PN in the US population for those over age 40 is nearly 15% (Gregg, Sorlie et al. 2004) and 28.4% in  
84 persons with diabetes (Hicks, Wang et al. 2021). The incidence of injuries due to falls is 15 times  
85 higher in patients with diabetic PN than in healthy individuals (Cavanagh, Derr et al. 1992).  
86 Furthermore, polyneuropathy contributes independently to functional impairments, including  
87 difficulty walking and a tendency to fall (Hoffman, Staff et al. 2015), and those individuals more  
88 often incur fall-related injuries (Hanewinkel, Drenthen et al. 2017). A prospective study of older  
89 individuals with PN found that 65% fell during a one-year period and 30% reported an injury from a  
90 fall (DeMott, Richardson et al. 2007).

91  
92 Mechanoreceptors play an important role in proprioception (Fallon, Bent et al. 2005, Vaughan 2021)  
93 and loss of sensory information from the lower limbs, including plantar mechanoreceptors alters  
94 balance performance (Meyer, Oddsson et al. 2004, Meyer, Oddsson et al. 2004). Furthermore, this  
95 sensory impairment affects the automaticity of walking, thereby increasing the need for cognitive  
96 attention to gait and mobility activities (Paul, Ada et al. 2005, Clark, Christou et al. 2014, Clark

## Extended Effects of a Wearable Sensory Prosthesis

97 2015). Furthermore, several studies have reported problems with gait and balance function and the  
98 increased risk of falls in patients with PN (Menz, Lord et al. 2004, DeMott, Richardson et al. 2007,  
99 Dixon, Knight et al. 2017, Lipsitz, Manor et al. 2018).

100  
101 Additionally, low gait speed is a risk factor for falls (Studenski, Perera et al. 2003, Montero-Odasso,  
102 Schapira et al. 2005), is an indicator of frailty (Kim, Glynn et al. 2019), and is even a predictor of  
103 hospitalization and disability (Cesari, Kritchevsky et al. 2005, Dumurgier, Elbaz et al. 2009) as well  
104 as survival (Studenski, Perera et al. 2011). In fact, interventions designed to improve gait speed may  
105 actually increase survival (Hardy, Perera et al. 2007). Older adults with sensory impairment related to  
106 PN show a decline in gait speed that is four times higher than in healthy aging (Buracchio, Dodge et  
107 al. 2010, Lipsitz, Manor et al. 2018).

108  
109 Although strength and balance training in patients with PN may help reduce fall risk falls (Ites,  
110 Anderson et al. 2011, Tofthagen, Visovsky et al. 2012, Streckmann, Zopf et al. 2014, Morrison,  
111 Simmons et al. 2018), strength training in patients with PN appears to have less impact on balance  
112 (Streckmann, Zopf et al. 2014). Its effects are mainly compensatory and do not address impaired  
113 somatosensation, the root cause of balance problems related to PN. Furthermore, balance training  
114 activities must be specific (Oddsson, Boissy et al. 2007) and must be conducted with sufficient  
115 intensity and frequency (Lipsitz, Macklin et al. 2019) to be helpful, or benefits will be limited or  
116 absent (Kruse, Lemaster et al. 2010, Lipsitz, Manor et al. 2018, Lipsitz, Macklin et al. 2019). Clear  
117 guidelines regarding frequency of balance exercises are currently lacking although three sessions a  
118 week may be a minimum necessary to see an improvement (Kruse, Lemaster et al. 2010). Thus,  
119 although “Falls can be prevented” (CDC 2021), they continue to be a large problem in older adults,  
120 indicating a continued need for novel solutions.

121  
122 We recently reported from our multi-site clinical trial (walk2Wellness, NCT #03538756,  
123 [www.clinicaltrials.gov](http://www.clinicaltrials.gov)) that individuals with PN and a high risk of falls improved their Functional  
124 Gait Assessment (FGA) scores, (Wrisley, Marchetti et al. 2004), Gait Speed, and Timed Up & Go  
125 times following 10 weeks of home-based use of a wearable sensory prosthesis intended to substitute  
126 nerve function related to impaired plantar sensation (Figure 1, Walkasins by RxFunction Inc., Eden  
127 Prairie, MN, USA), (Oddsson, Bisson et al. 2020). Previously, we found similar meaningful  
128 improvements in FGA scores and gait speed in participants with PN in a randomized crossover trial  
129 conducted in-clinic (Koehler-McNicholas, Danzl et al. 2019), findings that were recently referred to  
130 as “presumably emulating” signals by fast-adapting cutaneous afferents (Vaughan 2021). We also  
131 reported a decrease in the number of fall risk factors as well as fall rate from baseline to 10 weeks for  
132 individuals who reported falls in the six months preceding study participation (Oddsson, Bisson et al.  
133 2020).

134  
135 Here we report extended long-term use data from the walk2Wellness trial for 44 participants after 26  
136 weeks of Walkasins use. Furthermore, we analyzed falls during the 26 weeks of device use and  
137 compared to patient self-reports of falls from the six months preceding participation in the study. We  
138 expected improvements in clinical outcomes and lower fall rate seen after 10 weeks (Oddsson,  
139 Bisson et al. 2020) to be sustained at 26 weeks.

140  
141  
142

## 143 2 Materials and Methods

144 Detailed descriptions of materials and methods have been reported previously (Oddsson, Bisson et al.  
145 2020), and are summarized below. The measures we use have been validated (Oddsson, Bisson et al.  
146 2020) and our primary outcome measure, the FGA, is recommended for assessment of walking  
147 balance in adults with neurologic conditions by current physical therapy Clinical Practice Guidelines  
148 (Moore, Potter et al. 2018). The walk2Wellness study is registered at ClinicalTrials.gov  
149 (#NCT03538756). Figure 1 shows a picture of the Walkasins device components with a brief  
150 description of its functionality.

151

### 152 2.1 Participants

153 The walk2Wellness clinical trial received approval for human subject research from Advarra IRB  
154 (formerly Quorum Review) for four sites and from the IRB Subcommittee, the Subcommittee on  
155 Research Safety, and the Research and Development Committee of the Minneapolis VA Health Care  
156 System (MVAHCS). Recruitment for the walk2Wellness trial began in October 2018 and ended at  
157 the last site in April 2021. Because of COVID-19 disruptions, the study ended earlier than planned at  
158 four sites; the fifth site completed the trial but with a reduced enrollment goal. Study site team  
159 members posted fliers at community businesses and clinics to advertise the trial; in addition, some of  
160 the sites received referrals from physicians who were informed about the study.

161

162 To participate in the trial, individuals met the following inclusion criteria: male or female; ages 21-  
163 90; a formal diagnosis of sensory PN prior to participating in the study as indicated by their medical  
164 record or a letter by a physician; self-reported problems with balance; ability for transfers or  
165 ambulation on level surfaces at fixed cadence as assessed by trained study personnel; FGA score <23,  
166 the cut-off score for high fall risk (Wrisley and Kumar 2010); ability to understand and provide  
167 informed consent; foot size to allow the Walkasins device to function properly, and ability to  
168 complete all functional outcome measures without the use of an assistive device in order to ensure  
169 sufficient motor function. Participants could use an assistive device at their discretion during their  
170 daily activities.

171

172 Individuals were excluded if they were unable to perceive the tactile stimuli from the Walkasins Leg  
173 Unit (Figure 1) or if they used an ankle-foot orthosis for ambulation that prevented donning the  
174 device. In addition, individuals having any of the following conditions were excluded from  
175 participation: acute thrombophlebitis; deep vein thrombosis; untreated lymphedema; a lesion of any  
176 kind, swelling, infection, inflamed area of skin, or eruptions on the lower leg near placement of the  
177 device; foot or ankle fractures; severe peripheral vascular disease; or any musculoskeletal or  
178 neurological condition that would prohibit use of the device, as determined by a clinician. Because of  
179 a potential to overload the pressure sensors in the foot pad, individuals weighing over 136 kg (300  
180 lbs) were excluded from participation. The criteria to participate in the study were similar to  
181 receiving a prescription for the device in a clinic. Potential participants also agreed not to initiate any  
182 balance training (e.g., Tai-Chi, etc.) or balance-related therapy during the first 10 weeks of the trial  
183 (Oddsson, Bisson et al. 2020). Furthermore, participants were blinded to their outcomes during the  
184 trial and not shared by study personnel.

185

### 186 2.2 Study Procedures and Outcome Measures

187 Before undergoing any study-related procedures, individuals signed the IRB-approved consent form  
188 and HIPAA authorization. After enrollment, site staff tested whether participants were able to  
189 perceive the tactile stimuli from the Walkasins Leg Unit. Anyone unable to feel the tactile stimuli



## Extended Effects of a Wearable Sensory Prosthesis

190 was excluded from continued participation in the study. Individuals who were able to feel the tactile  
191 stimuli from the Walkasins Leg Unit bilaterally then completed a medical history form to assess  
192 common health issues and systemic diseases. They also provided information on falls they had  
193 experienced in the previous six and twelve months, including the number of falls and any injuries  
194 they sustained as a result. In addition, participants provided a list of their medications (medication  
195 name, indication, dose, and frequency), which was updated over the course of the study.

196  
197 Participants then completed the Activities-Specific Balance Confidence (ABC) Questionnaire  
198 (Powell and Myers 1995) to assess levels of balance self-confidence and the Vestibular Activities of  
199 Daily Living Scale (VADL), (Cohen, Kimball et al. 2000) to evaluate the effects of vertigo and  
200 balance disorders on their ability to perform everyday activities independently. At baseline, week 10,  
201 and week 26, site personnel also assessed participants using the Weinstein Enhanced Sensory Test  
202 (WEST) monofilament foot test (0.5g, 2g, 10g, 50g, and 200g), as described previously (Oddsson,  
203 Bisson et al. 2020). Staff also performed a vibration sensation test using a Rydel-Seiffer Tuning Fork  
204 to document loss of sensation (Kästenbauer, Sauseng et al. 2004, Oddsson, Bisson et al. 2020).  
205 Scoring values  $\leq 4$  at the first metatarsal joint is categorized as abnormal (Kästenbauer, Sauseng et al.  
206 2004).

207  
208 During the baseline visit, participants donned the Walkasins devices and performed a standardized  
209 set of standing and walking balance activities focused on orientation and familiarization with the  
210 device, referred to as the Walkasins Learning Protocol (Koehler-McNicholas, Danzl et al. 2019,  
211 Oddsson, Bisson et al. 2020). Trained site personnel then assessed participants on the FGA, 10-Meter  
212 Walk Test (Perera, Mody et al. 2006), Timed Up & Go (TUG) (Mathias, Nayak et al. 1986), and 4-  
213 Stage Balance Test (CDC 2021). The clinical outcomes were standardized and performed by study  
214 personnel who were trained by one of the investigators (DW). A sponsor representative conducted  
215 observation visits periodically during the study to ensure standardization across the sites (LJ).

216  
217 After finishing the clinical outcome tests, participants completed the following self-reported outcome  
218 measures to provide information about their quality of life, pain level, and engagement in social  
219 activities: Patient Health Questionnaire (PHQ-9) (Kroenke, Spitzer et al. 2001), PROMIS Pain  
220 Interference Short Form 6b (Askew, Cook et al. 2016), PROMIS Pain Intensity Form 1a, Ability to  
221 Participate Short Form 8a (Hahn, Kallen et al. 2016), and Satisfaction with Participation in Social  
222 Roles Short Form 8a (Hahn, DeWalt et al. 2014, Hahn, Beaumont et al. 2016). At the conclusion of  
223 the baseline visit, site staff members trained the participants on caring for the device.

224  
225 Participants left the baseline visit with the device and a calendar on which to note any fall events they  
226 experienced as well as their use of Walkasins. For consistency across sites, we used the World Health  
227 Organization's definition of a "fall": "A fall is an event which results in a person coming to rest  
228 inadvertently on the ground or floor or other lower level." When participants reported falls, study  
229 staff recorded the following: the fall date; severity (no injury, minor injury, or major injury); the level  
230 of treatment the individual sought or received, if any; the cause or causes of the fall (environmental  
231 factor, lost balance, lost consciousness, lost strength/felt weak, slipped, tripped, on new medication,  
232 other, unknown); and a description of the fall.

233  
234 Unless prevented from doing so because of COVID-19 site restrictions, participants returned for in-  
235 person visits at weeks 2, 6, 10, and 26. These visits followed most of the same procedures as the  
236 baseline visit: balance questionnaires, clinical assessments, and self-reported outcome measures. As  
237 we have previously reported (Oddsson, Bisson et al. 2020) we calculated ABC to FGA ratios at each

## Extended Effects of a Wearable Sensory Prosthesis

238 assessment to measure the degree of internal self-perception of balance capability (ABC score) in  
239 relation to the externally observed walking balance performance (FGA score). We noted that a ratio  
240 of around 3.3 would be “expected” based on the maximum scores of the two scales. This construct  
241 aligns with a multifactorial causation model for falls emphasizing the importance of a “Realistic  
242 Appraisal of One’s Own Abilities”, (Hadjistavropoulos, Delbaere et al. 2011).

243  
244 Between the in-person visits at weeks 10 and 26, study sites contacted participants via telephone at  
245 weeks 14, 18, and 22 to remind them of study requirements and to collect follow-up information  
246 regarding health changes, falls, adverse events, pain scores, device usage, and device functioning, as  
247 well as whether they had begun any physical therapy for their balance problems. If participants  
248 reported adverse events and/or falls during these contacts, site personnel recorded the details on the  
249 appropriate case report forms in REDCap Cloud, the electronic data capture system used in the study  
250 (<https://www.redcapcloud.com/>, Encinitas, CA, United States).

### 251 **2.1 Statistical Analysis and Availability of Data**

252 An analysis of outcomes after 2, 6, and 10 weeks, with 10 weeks being the primary endpoint, was  
253 presented earlier (Oddsson, Bisson et al. 2020). Here we focus on outcomes after extended long-term  
254 device use and compare outcomes to baseline for individuals participating in 26 weeks of device use.  
255 Graphical data from 2, 6 and 10 weeks are provided below for illustration. We calculated descriptive  
256 statistics (mean and standard deviation or median as appropriate) for all variables and tested for  
257 normality with the Shapiro-Wilk’s test. We applied the two-proportion Z-test to compare proportion-  
258 based measures. We conducted a post-hoc analysis to compare participants at baseline who reported  
259 falls in the previous six months (Pre-Fallers, n=25) to those who did not (Pre-NonFallers, n=19).  
260 Their baseline characteristics were compared using a t-test for independent samples or a Mann-  
261 Whitney U test if data was not normally distributed based on a Shapiro-Wilk’s test.

262  
263 To compare baseline variables to those after 26 weeks of device use, we conducted a t-test for  
264 dependent samples or Wilcoxon signed-rank test in case variables were not normally distributed. We  
265 applied a Bonferroni’s adjustment of significance levels for correlated measures, ranging from  
266  $p < 0.0167$  ( $0.05/3$  for three comparisons) for a full correction (non-correlated measures,  $r=0$ ) and  
267  $p < 0.05$  for perfectly correlated measures ( $r=1$ ) (Uitenbroek 1997). We calculated effect sizes using  
268 Cohen’s  $d_{fm}$  according to recommendations by Lakens (Lakens 2013) and interpreted them according  
269 to Cohen (Cohen 1988), i.e. 0.2 represents a small effect, 0.5 a medium effect, and 0.8 a large effect  
270 size. Ninety-five percent confidence intervals of effect sizes were estimated according to Algina  
271 (Algina, J et al. 2005).

272  
273 We performed statistical analysis with the Analysis-ToolPak module in Microsoft Excel 2016 and the  
274 Real Statistics Resource Pack software, release 6.8 (Zaiontz 2020). Baseline characteristics of  
275 participants in the study from the four clinical sites are presented in Table 1. We have pooled the data  
276 for the continued analysis presented here. The raw data supporting the conclusions of this article will  
277 be made available to qualified researchers without undue reservation.

278  
279

## 280 **3 Results**

### 281 **3.1 Enrollment and Allocation**

282 Our previous report with 45 participants at the 10 week primary endpoint (Oddsson, Bisson et al.  
283 2020) was published early due to the unknown circumstances at the time related to COVID-19,  
284 which had caused recruitment holds and suspension of in-person testing activities at the research  
285 sites. Over time, the trial continued with the enrollment of additional participants who are part of the  
286 current report as illustrated in the flow chart in Figure 2. Figure 2 shows the flow chart for the study  
287 as it was continued from the 10-week primary endpoint assessment that we have previously reported  
288 (Oddsson, Bisson et al. 2020). Text boxes with dashed lines in Figure 2 indicate enrollment numbers  
289 for the initial 10-week report.

290  
291 Of the 85 individuals who were assessed for eligibility, a total of 69 participants were enrolled in the  
292 trial (17 more than in previous report, cf. Figure 2). Sixty participants took part in the 2-week follow  
293 up visit, 55 in the 6-week follow-up visit, and 51 in the 10-week follow-up visit (six more than in the  
294 previous report). Eleven of the 18 participants who discontinued interventions through the 10-week  
295 follow-up visit stopped participation due to circumstances related to COVID-19 (cf. Figure 2). (Note:  
296 due to the timing of study initiation at Johns Hopkins and the onset of the pandemic, the three  
297 participants enrolled at the site were unable to complete most in-person assessments. When the  
298 situation did not improve, the sponsor decided to terminate Johns Hopkins as a research site. None of  
299 the participants had completed follow-up datasets through week 10, so their results were not included  
300 in this analysis.)

301  
302 Forty-four of the 51 participants who reached the 10-week follow-up assessment were analyzed after  
303 their 26-week assessment. Due to circumstances related to COVID-19, including lockdowns at the  
304 research sites, 14 of the 44 participants were unable to participate in the 26-week in-person outcomes  
305 testing (FGA, 10MWT, TUG, and 4-Stage Balance Test). All 44 participants, however, were  
306 assessed on self-reported outcomes over the phone, and all 44 participants provided reports of falls  
307 throughout the 26-week period. Consequently, we report baseline assessment of clinical outcomes for  
308 all 44 participants, comparing those who reported falling in the prior six months (Pre-Fallers) to those  
309 who did not (Pre-NonFallers). We also present data over time for the 30 participants who completed  
310 the 26-week in-person assessment (weeks 0, 2, 6, 10 and 26, Figure 2), comparing the baseline  
311 assessments of those 30 participants to their 26-week assessment.

312  
313 Seven of the 44 participants discontinued the intervention after the 10-week assessment (cf. Figure  
314 2); one passed away; two had been enrolled in solely the 10-week protocol; three expressed device  
315 dissatisfaction, and one experienced an unrelated adverse event.

### 316 **3.2 Baseline Characteristics and Outcomes**

317 Baseline characteristics for the 44 individuals who were evaluated at 26 weeks are shown in Table 1  
318 and were substantially similar to those reported previously (Oddsson, Bisson et al. 2020). Participants  
319 across all sites were pooled for the continued analysis.

320  
321 The baseline characteristics of the 44 participants are shown in Table 2. Characteristics are also  
322 reported separately for participants who reported falling in the six months preceding the study (Pre-F,  
323 n=25) and participants who did not report a fall (Pre-NF, n=19). Overall, characteristics reported  
324 previously for participants entering the trial were maintained (Oddsson, Bisson et al. 2020) except for

## Extended Effects of a Wearable Sensory Prosthesis

325 some substantiated differences between the Pre-F and Pre-NF participants that were now statistically  
326 significant (Table 2). In addition to previous observations, baseline self-selected gait speed and ABC  
327 scores were significantly different between the Pre-F and Pre-NF groups, 0.83 m/s vs. 0.97 m/s and  
328 57.8% vs. 69.6%, respectively (Table 2). A higher observed mean value in PHQ-9 score for the Pre-F  
329 group was nearly statistically significant (5.7 vs. 3.3, respectively,  $p=0.052$ ). Mean values for all  
330 PROMIS measures were near 50, and any differences were well within 10 (Table 2) corresponding to  
331 one standard deviation for these measures, indicating any observed differences were minor (Askew,  
332 Cook et al. 2016, Hahn, Beaumont et al. 2016, Hahn, Kallen et al. 2016).

### 333 3.3 Clinical Outcomes

334 Improvements in FGA scores were seen across all individuals, irrespective of their baseline FGA  
335 scores and appeared similar after 2-, 6-, 10- and 26-weeks of device use (Figure 3). This finding is  
336 indicated by the regression lines in Figure 3 being shifted above the line of equality. Figure 3 also  
337 illustrates similar improvements in FGA scores for the Pre-F group and the Pre-NF group (filled vs.  
338 open symbols). Interestingly, the slope of the regression line was  $<1$  at all assessments indicating  
339 larger improvements in the lower range of baseline FGA scores mostly representing Pre-F group  
340 participants (cf. Table 3 and further below). After 26 weeks of device use, FGA scores increased  
341 across all individuals from 15.0 to 19.2 ( $p<0.00001$ , Table 3) indicating a large effect size (Cohen's  
342  $d_{rm}=1.38$ , Table 3). Furthermore, self-selected gait speed increased from 0.89 m/s to 0.97 m/s  
343 ( $p=0.02$ ), a medium effect size (Cohen's  $d_{rm}=0.49$ ); and the 4-Stage Balance Test improved from  
344 25.6 s to 28.4 s ( $p<0.01$ ), representing a small effect size (Cohen's  $d_{rm}=0.32$ ). An increase seen in fast  
345 gait speed (1.30 m/s to 1.37 m/s) did not reach statistical significance ( $p=0.07$ ). Changes in Rydel-  
346 Seiffert tuning fork testing scores suggested a small decrease in sensitivity at the site of the lateral  
347 malleolus (mean 3.8 to 3.2,  $p=0.032$ , Cohen's  $d_{rm}=0.32$ ), while a noted decrease at the MTP joint did  
348 not reach statistical significance ( $p=0.07$ ).

349  
350 The Pre-F cohort ( $n=18$ ) improved their mean FGA score from 13.7 at baseline to 18.1 at 26 weeks  
351 ( $p<0.0001$ , Table 3) representing a large effect size (Cohen's  $d_{rm}=1.58$ ). Their observed increases in  
352 self-selected gait speed from 0.82 m/s to 0.90 m/s and from 1.13 m/s to 1.23 m/s for fast gait speed  
353 did not reach statistical significance ( $p=0.12$  and  $p=0.07$ , respectively). The Pre-F group showed a  
354 decrease in vibration sensation at the first MTP joint (mean 2.9 to 1.8,  $p<0.005$ ) and at the lateral  
355 malleolus that did not reach statistical significance (mean 3.75 to 3.25,  $p=0.07$ ).

356  
357 The Pre-NF group ( $n=12$ ) increased their mean FGA score from 17.0 at Baseline to 20.8 at 26 weeks  
358 ( $p<0.004$ , Cohen's  $d_{rm}=1.23$ , Table 3). A small increase in self-selected gait speed from 1.00 m/s to  
359 1.08 m/s did not reach statistical significance ( $p=0.06$ ). Other clinical outcomes, including Rydel-  
360 Seiffert tuning fork sensitivity testing scores, remained unchanged at 26 weeks compared to baseline  
361 (Table 3).

362  
363 The mean values of all in-person outcomes across the 26 weeks of device use for all participants are  
364 depicted in Figure 4 and are shown separately for the Pre-F and the Pre-NF groups. In general, the  
365 behavior over time of the two subgroups was qualitatively similar, although the Pre-NF group  
366 consistently performed better than the Pre-F cohort.

### 367 3.4 Self-reported Outcomes, Device Use and ABC to FGA ratios

368 Self-reported outcomes for the 44 participants who completed assessments through 26 weeks are  
369 shown in Table 4. Across all participants, a slight but statistically significant increase was seen in



## Extended Effects of a Wearable Sensory Prosthesis

370 PROMIS Ability to Participate scores after 26 weeks of device use (49.9 to 52.6,  $p < 0.05$ ). All  
371 baseline values were maintained at 26 weeks for the Pre-F group while we noted an increase in the  
372 PROMIS Satisfaction with Social Roles scores (49.9 to 55.5,  $p < 0.006$ ) for the Pre-NF group.

373  
374 Participants documented their weekly device use in a calendar and were asked to report it back  
375 during phone calls at weeks 14, 18, 22 and 26. Their average reported weekly device use was  $5.1 \pm 0.4$   
376 days. Participants reporting that they used the device weekly either “Every Day” or “At least 5 Days”  
377 was  $71.8 \pm 10.5\%$ . An average of  $94.8 \pm 3.3\%$  of reporting participants stated they used the device “1-2  
378 Days” or more per week.

379  
380 We also sought to monitor participants’ self-perceived balance confidence (Lajoie and Gallagher  
381 2004) in relation to their assessed gait function performance over time in the trial by measuring  
382 changes in the ABC to FGA ratio, which is shown in Figure 5. Figure 5 illustrates two observations.  
383 First, the ABC/FGA ratio for the overly confident individuals gradually decreased from high values  
384 at baseline to week 6 when the ratio essentially aligned with the low self-confidence participants,  
385 who maintained a consistent ABC/FGA ratio of about 3.5 throughout the 26 week period of the trial  
386 (Figure 5, left y-axis). Second, both groups of participants increased their FGA scores in a similar  
387 fashion although the overly confident participants showed higher levels of improvement in their FGA  
388 scores (Figure 5, right y-axis).

### 389 **3.5 Falls Data**

390 Falls were reported throughout the 26-week period for all 44 participants and separately for the Pre-F  
391 ( $n=25$ ) and Pre-NF ( $n=19$ ) groups, respectively (Table 5). The 44 participants reported a total of 53  
392 falls over 6 months prior to participating in the trial while 39 falls were documented during the 26  
393 weeks of the trial, corresponding to a pre-study mean fall rate of 6.7 falls/1000 patient days  
394 (median=5.6 falls/1000 patient days) and a post study mean fall rate of 4.8 falls/1000 patient days  
395 (median=0 falls/1000 patient days). Wilcoxon Signed Rank test was used to compare pre- and post-  
396 study fall rates since the data was not normally distributed (Shapiro-Wilk W-statistic=0.82,  
397  $p < 0.0001$ ). Across all participants, the median of the post-study fall rate was lower than the pre-study  
398 fall rate (Table 5,  $p=0.044$ ), reflecting a 28% decrease in fall rate. Of the 44 participants, 25 had  
399 fallen in the past six months (Pre-F); and after 26 weeks, 20 of the 44 participants had reported  
400 falling. Overall, 31 of the 39 falls required no treatment while eight falls (~20%) required treatment  
401 with four of those (~10%) causing severe injury (two fractures) (Table 5).

402  
403 The 25 participants in the Pre-F cohort reported 31 falls after 26 weeks compared to 53 falls pre-  
404 study corresponding to a pre-study fall rate of 11.8 falls/1000 patient days (median=11.1), which  
405 decreased to 6.7 falls/1000 patient days at 26 weeks (median=5.0), a 43% decrease in fall rate  
406 ( $p=0.0043$ ). Of the 25 Pre-F participants, 12 did not fall during the study, a 48% statistically  
407 significant decrease in number of fallers ( $p < 0.0001$ ). Of the 31 falls experienced by the Pre-F cohort,  
408 six (~20%) required treatment (Table 5). Three of the four falls that led to severe injury occurred in  
409 the Pre-F group.

410  
411 Seven of the 19 Pre-NF participants reported falling during the trial ( $p < 0.0001$ ) leading to an increase  
412 in fall rate from zero to 2.3 falls/1000 patient days at 26 weeks that was statistically significant  
413 ( $p=0.023$ ). A total of eight falls were reported by the seven Pre-NF participants who fell during the  
414 study (Table 5). Two of the eight falls in the group required treatment, and one fall led to a severe  
415 injury.

416

## Extended Effects of a Wearable Sensory Prosthesis

417 Figure 6 illustrates the cumulative sum of falls based on six-month pre-study fall reports from the  
418 participants and the falls recorded by the Pre-F cohort during the trial. The 53 pre-study falls were  
419 randomly distributed across the six-month pre-study period for illustration purposes since the exact  
420 time of their occurrence prior to the trial were not known (see Figure 6). Note that 53 falls over a  
421 period of six months corresponds to  $53/180 \sim 0.29$  falls/day, which becomes the slope of the blue  
422 regression line in Figure 6, irrespective of the random distribution of the pre-study falls. The in-study  
423 falls are presented on the day they occurred according to participant reports (see Figure 6). The in-  
424 study decrease of falls quantified in Table 5 can be visually observed over time in Figure 6 as a lower  
425 slope for the best fit regression line (blue-dotted line pre-study vs. orange-dotted line in-study). It  
426 should be noted that the lower slope appears to begin after about 20 days of device use.  
427  
428

## 429 4 Discussion

### 430 4.1 Key Findings

431 Walkasins is a device that provides mechanical tactile stimuli related to foot pressure for individuals  
432 with PN and gait and balance problems. Overall, our findings from analyzing outcomes after 26  
433 weeks of wearing Walkasins show that improvements in outcomes seen after 10 weeks of use are  
434 sustained longer term (Oddsson, Bisson et al. 2020). The FGA score was improved from 15.0 at  
435 baseline to 19.2 after 26 weeks of device use across all participants, a large effect size (Cohen's  
436  $d_{rm}=1.38$ ) and an increase that is beyond the MCID for community-dwelling older adults (Beninato,  
437 Fernandes et al. 2014). Interestingly, these improvements were seen for individuals across the full  
438 range of baseline FGA scores, from the lowest of 7 to the highest of 22 (Figure 3) with a tendency to  
439 be higher for individuals in the lower FGA range. Furthermore, similar improvements were seen for  
440 the Pre-F and Pre-NF cohorts. Moreover, the 46% decrease in fall rate, compared to pre-study falls  
441 we reported after 10 weeks of use, was sustained at 43% after 26 weeks, an important observation  
442 further discussed below. Weekly device use continued to be high and similar to after 10 weeks (5.1  
443 vs. 5.3 days/week, respectively (Oddsson, Bisson et al. 2020)).

444  
445 All clinical outcomes improved compared to baseline, but changes in TUG and 4-Stage Balance did  
446 not reach statistical significance, likely because the study was underpowered for these measures  
447 (Table 3). Previous work has found that older individuals with diabetic PN walk slower than their  
448 healthy cohort (Menz, Lord et al. 2004), and older adults with peripheral sensory impairment show a  
449 0.046m/s/yr. decline in gait speed (Lipsitz, Manor et al. 2018). This decrease is more than 3.5 times  
450 higher than declines reported in healthy aging (Buracchio, Dodge et al. 2010). With this in mind, it is  
451 encouraging to report a statistically significant 0.08m/s increase in gait speed across all  
452 participants in this trial, which is beyond a small meaningful change (0.05m/s) and close to the range  
453 for a substantial meaningful change (0.10m/s) (Perera, Mody et al. 2006).

454  
455 Participants had a decrease in sensitivity to vibration, an overall small decrease at the lateral  
456 malleolus and a larger change at the MTP joint in the Pre-Faller group. Such changes did not occur at  
457 the 10-week assessment (Oddsson, Bisson et al. 2020). This decrease in tuning fork vibration  
458 perception may indicate a progression of some participants' PN and increased sensory loss. In spite  
459 of such changes, none of the participants stated that they were unable to perceive the stimuli provided  
460 by the device, suggesting they were still benefiting from its use as confirmed by improved clinical  
461 outcomes.

### 462 4.2 Balance Exercise Interventions and their Limitations

463 We can compare our findings to interventions using different forms of physical exercise in patients  
464 with PN since we see similar improvements in outcomes from simply wearing the device in the  
465 current trial. Several review studies conclude that balance training is “the most effective exercise  
466 intervention” (Ites, Anderson et al. 2011, Tofthagen, Visovsky et al. 2012, Streckmann, Zopf et al.  
467 2014, Morrison, Simmons et al. 2018), while strength training in patients with PN appears to have  
468 less impact on balance (Streckmann, Zopf et al. 2014), likely due to lack of specificity related to  
469 balance (Oddsson, Boissy et al. 2007). Although such interventions may improve balance outcomes,  
470 effects are essentially compensatory since they do not address the root cause of the balance problem  
471 in these patients, namely their impaired plantar sensation due to PN. Furthermore, any exercise  
472 activity would need to be maintained on a regular basis long-term or benefits would gradually be lost  
473 (Melzer and Oddsson 2013, van Waart, Stuiver et al. 2015), sometimes referred to as the “use it or

## Extended Effects of a Wearable Sensory Prosthesis

474 lose it” principle (Hart 2021). This phenomenon is problematic because individuals sometimes  
475 become sedentary due to health problems unrelated to their balance disorders. Likewise, long-term  
476 compliance with exercise interventions is a challenge, due to motivation or lack of safety resources,  
477 and has been reported to be low with over half of participants not being compliant (Sluijs, Kok et al.  
478 1993, Alexandre, Nordin et al. 2002), likely causing diminished benefits of the exercise intervention.  
479

480 The improvements in clinical outcomes we report here, were gained from a single, brief training visit  
481 on the use of the sensory prosthesis and then simply by wearing it during regular daily activities. By  
482 comparison, obtaining the benefits of an exercise intervention requires the presence and engagement  
483 by the individual, at multiple therapy visits. In fact, during the first 10 weeks of use, we prohibited  
484 participants from joining in any physical therapy or balance-related exercise activities to help isolate  
485 the effect of the device (Oddsson, Bisson et al. 2020). Knowing, however, that such interventions  
486 may help improve gait and balance function (Toftagen, Visovsky et al. 2012), we felt it would  
487 potentially be unsafe and even unethical to prevent participation in those activities beyond the  
488 primary endpoint at 10 weeks. Therefore, to control for any potential effects of balance exercise  
489 interventions, we asked participants during follow-up phone calls at 14, 18, and 22 weeks whether  
490 they had begun any physical therapy for their balance problems. Not surprisingly, only one of the  
491 participants answered “yes” to this question, emphasizing the above-mentioned challenge with  
492 exercise engagement and compliance, and further suggesting that long-term use of the device was the  
493 main cause of improvement in clinical outcomes.

### 494 **4.3 Exercise Dosing versus Daily Exposure from Sensory Prosthesis Use**

495 These improvements in clinical outcomes are not surprising, because the mechanisms for improved  
496 gait and balance function from exercise interventions are different than the mechanisms for using a  
497 sensory prosthesis to replace an important component of somatosensory balance input, in this case  
498 from plantar mechanoreceptors (Meyer, Oddsson et al. 2004, Fallon, Bent et al. 2005, Strzalkowski,  
499 Peters et al. 2018). Traditional balance training activities stimulate existing sensorimotor integration  
500 by challenging function with a series of successively more difficult motor tasks. This kind of  
501 treatment gradually improves performance based on important and well-known principles of training  
502 (Oddsson, Boissy et al. 2007). Such improvement may be attributable to training of specific splinter  
503 skills, and some improvement may be due to compensation for balance issues from impaired plantar  
504 sensation or address other balance related impairments. Users of a sensory prosthesis, however,  
505 receive new functional sensory stimuli on a nearly continuous basis that are highly specific to  
506 standing and walking and replace their impaired sense; and these new stimuli provide sensory  
507 information that the central nervous system expects to receive from the lower extremities during such  
508 activities (Guertin 2012, Clark 2015).  
509

510 To analyze this contrast further, a research trial of traditional balance training interventions typically  
511 provides one-hour balance stimulation sessions about 2-3 times per week for 3-6 months e.g.  
512 (Shumway-Cook, Gruber et al. 1997, Wolf, Feys et al. 2001, Wolf, Sattin et al. 2003, Li, Harmer et  
513 al. 2005, Li and Manor 2010, Melzer and Oddsson 2013, Manor, Lough et al. 2014). Assuming 100%  
514 compliance, this example would add up to an overall exercise dose of no more than 72 hours of  
515 focused therapeutic balance stimulation over six months. In a typical therapy practice, the dose would  
516 more likely be in the range of 8-40 hours, for several reasons (HS Cohen, EdD, OTR, personal  
517 communication). Patients sometimes miss visits due to schedule conflicts. Patients may shorten the  
518 total length of treatment either because they feel they have reached their maximum level of  
519 improvement, because they dislike the hassle of taking the time for the therapy visit, or because they  
520 cannot get transportation. In addition, some insurance programs may refuse to pay for more than a



## Extended Effects of a Wearable Sensory Prosthesis

521 limited number of therapy visits. In the case of exposure to balance stimuli from a sensory prosthesis,  
522 however, participants used the device on average 36.1 hours/week with more than 80% using the  
523 device over 21 hours/week (Oddsson, Bisson et al. 2020). Over 26 weeks this use would amount to a  
524 range from around 500 to almost 1000 hours of specific gait and balance stimulation, essentially an  
525 order of magnitude higher than a regular balance training intervention. Furthermore, the device is  
526 intended to be used on a continuous basis, which furthers compliance.

527  
528 Participants may not be physically active and receiving sensory stimuli the entire abovementioned  
529 time. However, they will regularly experience hundreds of specific balance stimuli/hour that are  
530 intimately integrated into their regular standing and walking activities and that are likely to cause  
531 related changes in balance behavior. Over time, this feedback may lead to a reweighting of sensory  
532 information that is relevant for balance function (Sienko, Seidler et al. 2018), as has previously been  
533 suggested in older adults performing in-home balance training using vibrotactile sensory stimulation  
534 related to trunk tilt (Noohi, Kinnaird et al. 2017, Bao, Carender et al. 2018) further supported by  
535 recently reported changes in brain connectivity (Bao, Noohi et al. 2022).

536  
537 Interestingly, early observations from a pilot study of five participants in the cohort studied here, who  
538 completed 26 weeks of device use, show neuroplastic changes in brain network connectivity related  
539 to postural control and balance that were associated with improved changes in FGA scores (Hsu,  
540 Iloputaife et al. 2021). This finding indicates a direct effect of the sensory prosthesis initiating plastic  
541 changes related to sensorimotor interaction and postural control. Related observations on  
542 sensorimotor neuroplastic effects associated with peripheral afferent activity have previously been  
543 made following a novel amputation strategy, agonist-antagonist myoneural interface, intended to  
544 maintain neuromuscular communication of the lost limb (Srinivasan, Tuckute et al. 2020). This  
545 surgical technique intends to promote proprioceptive feedback and cause central sensorimotor plastic  
546 changes that may facilitate control of a prosthetic limb (Srinivasan, Tuckute et al. 2020). In a similar  
547 fashion, the current non-invasive sensory prosthesis is externally providing new tactile afference,  
548 essentially through the same dermatomes that signaled plantar pressure information from  
549 mechanoreceptors that have become functionally deafferented due to PN (Fallon, Bent et al. 2005,  
550 Koehler-McNicholas, Danzl et al. 2019, Vaughan 2021).

### 551 **4.4 ABC to FGA Ratios, Self-Reported Outcomes and Device Use**

552 On the ABC, 67% is the cut-off for high-fall risk (Lajoie and Gallagher 2004). We previously  
553 reported that participants with baseline ABC scores below 67% improved their ABC scores after 10  
554 weeks of device use, whereas those with ABC scores above 67% did not, although both subgroups  
555 improved their FGA scores (Oddsson, Bisson et al. 2020). Since these two categories of participants  
556 had similar baseline FGA scores, the discrepancy in ABC scores led to seemingly high baseline ABC  
557 to FGA ratios in participants with high ABC scores (Oddsson, Bisson et al. 2020) (Figure 5). We  
558 posited that the high ratio individuals were either too confident or simply unaware of their abilities or  
559 impairments, a construct that aligns with a proposed multifactorial causation model for falls  
560 emphasizing the importance of a “Realistic Appraisal of One’s Own Abilities”, (Hadjistavropoulos,  
561 Delbaere et al. 2011). This ratio indicates the degree of internal self-perception of balance capability  
562 (ABC score) in relation to the externally observed performance (FGA score). A ratio of around 3.3  
563 would be “expected” based on the maximum scores of the two scales (Powell and Myers 1995,  
564 Wrisley and Kumar 2010). We further noted that after six weeks of device use, the overly confident  
565 participants appeared to “normalize” their self-perception indicating a more sensible perception of  
566 their abilities and align with those holding more expected ABC scores. This change was mainly due  
567 to an improvement in their FGA score and a maintained or slightly decreased ABC score.

## Extended Effects of a Wearable Sensory Prosthesis

568 We show here that this observation is preserved after 26 weeks of device use (Figure 5). This change  
569 in self confidence is important because it is a fall risk factor. As the data suggest, this ratio is a  
570 modifiable risk factor. Therefore, the ratio can and should be measured during studies of balance  
571 interventions.

572  
573 Furthermore, the current data (Figure 5) shows that the high-confidence individuals appear to  
574 improve their FGA scores more than the low confidence individuals. Since the baseline FGA scores  
575 were similar for these two cohorts, it could be argued that the higher balance-confidence individuals  
576 may have “naturally” challenged themselves more in their daily activities, triggering a larger increase  
577 in FGA score. Correspondingly, the low balance-confidence individuals may have “explored” their  
578 improved functional capabilities less than the high confidence group leading to a less beneficial long-  
579 term effect. We postulate that individuals with low balance confidence would potentially benefit  
580 further from a guided interaction through physical and occupational therapy or other means, whereas  
581 the high confidence individuals may be better at “self-coaching” their renewed capabilities.  
582 Consequently, to provide an individually optimized rehabilitation strategy for falls prevention and  
583 self-efficacy, clinicians should monitor outcomes that measure both balance outcomes and balance  
584 confidence, similar to the ratio we have used to allow this construct to be investigated further  
585 (Hadjistavropoulos, Delbaere et al. 2011, Soh, Tan et al. 2021).

586  
587 Additional observations related to self-report measures were in line with our previous reporting  
588 (Oddsson, Bisson et al. 2020), overall showing marginal changes and likely being less clinically  
589 meaningful since they were near the average for the US population (Hahn, DeWalt et al. 2014,  
590 Askew, Cook et al. 2016, Hahn, Beaumont et al. 2016, Hahn, Kallen et al. 2016). The continued high  
591 level of device use, on average more than five days a week and over 70% of participants using it  
592 every day or at least 5 days/week, suggests that users find the device helpful.

### 593 **4.5 Falls Data**

594 One of the most important findings from this trial is the 43% decrease in fall rate for participants with  
595 a fall history following 26 weeks of device use. We reported an encouraging 46% decrease already  
596 after 10 weeks of use (Oddsson, Bisson et al. 2020), while appreciating that 10 weeks would not be  
597 long enough for a relevant comparison to six months of pre-study data. Consequently, the similar  
598 statistically significant decrease after 26 weeks provides a stronger argument for a meaningful  
599 decrease in falls. In fact, even including the pre-study non-fallers in the analysis showed a  
600 statistically significant decrease in fall rate over 26 weeks of device use (Table 5). Note, however,  
601 that fall rate was not a primary outcome in this trial. In fact, we gathered pre-study falls data  
602 primarily as a means of describing our study population, and we monitored falls during the trial as a  
603 subset of adverse events. Thus, we enrolled participants at high fall risk based on their FGA scores,  
604 irrespective of whether or not they had fallen in the past. This procedure allowed us to conduct a  
605 post-hoc analysis and investigate any trend in the data indicating an actual decrease in falls. A  
606 comparison with historical self-report data on prior falls is far from ideal as compared to a parallel  
607 arm trial with a control group, but other investigators have found that asking individuals to recall past  
608 falls commonly leads to an underreporting of actual falls; even recalling the past 3 months led to 25%  
609 underreporting of falls (Hannan, Gagnon et al. 2010), and 26% did not recall falls over the prior six  
610 months (Cummings, Nevitt et al. 1988). Under such circumstances, the 43% decrease in falls  
611 reported here probably underestimates the real effect.

612  
613 The data on injuries reported from falls are probably clinically significant. Previous studies have  
614 reported that 65% of older individuals with PN fell over a year with 30% reporting an injury from a

## Extended Effects of a Wearable Sensory Prosthesis

615 fall (DeMott, Richardson et al. 2007). In a study of individuals with chemotherapy-induced PN, over  
616 40% experienced falls, and more than 40% of falls resulted in an injury, two-thirds of which were  
617 fractures (Komatsu, Yagasaki et al. 2019). In this study, 57% of participants reported falling in the  
618 six months prior to the study while 45% fell during six months of the trial. Eight of the 39 falls  
619 during the trial (20.5%) led to injuries where treatment was sought, half of those considered serious.  
620 Consequently, both fall rate and injury rate are lower than previous reports of similar populations  
621 (DeMott, Richardson et al. 2007, Komatsu, Yagasaki et al. 2019).

### 622 **4.6 Study Limitations**

623 This study had several limitations, as we have previously outlined (Oddsson, Bisson et al. 2020). It  
624 was an unblinded, single arm trial. Our decision to conduct a single arm trial was based on several  
625 factors, including previous results from an in-clinic randomized control cross-over trial showing  
626 improved FGA scores when using the device turned on compared to off (Koehler-McNicholas, Danzl  
627 et al. 2019). In addition, data from the first-in-human, long-term use study showed remarkable  
628 improvements in clinical outcomes in a patient with PN using the device for a year following over  
629 five months of balance physical therapy with limited improvement (Wrisley, McLean et al. 2021).  
630 This individual continues to use the device daily, now for more than four years. Also, blinding  
631 participants in a study using this kind of intervention is challenging and may not really be viable  
632 unless some form of deception is used since a requirement to use the device is perceiving the tactile  
633 stimuli (Oddsson, Bisson et al. 2020). Consequently, the most feasible placebo treatment for a control  
634 group would likely be wearing a device that is non-functional.

635  
636 An important strength of the trial includes our real-life inclusion/exclusion criteria that were  
637 essentially the same as the requirements for receiving a prescription for the device outside of a  
638 research trial. These requirements are aligned with the intentions of a pragmatic clinical trial to  
639 advance applicability of study findings (Patsopoulos 2011, Gill, Bhasin et al. 2021). Only 7% of  
640 participants (6 of 85) were excluded due to medical circumstances (Figure 2). We wanted the  
641 participants to realistically reflect patients who are seen in the clinic, and we did not try to screen for  
642 only those individuals who may be the best responders. In fact, our participants reported an average  
643 of 8.3 chronic conditions, had multiple fall-risk factors, and polypharmacy (mean of 8 subscription  
644 medications).

645  
646 Furthermore, the long-term benefits we report here combined with the participants not receiving any  
647 useful feedback about their outcomes or systematic encouragement during their assessments and  
648 knowing that only one individual decided to participate in a balance therapy intervention, decreases  
649 the chance these effects are placebo (Finniss, Kaptchuk et al. 2010, Enck, Bingel et al. 2013, Coste  
650 and Montel 2017). A review of placebo effects in 47 randomized control trials found large effects in  
651 subjective outcomes and small effects in clinical outcomes, which is the opposite of what we report  
652 here, further suggesting effects are due to device use. Additional strengths include our use of  
653 recommended standardized objective clinical outcome measures (Moore, Potter et al. 2018) and the  
654 involvement of multiple clinical sites from different regions using different evaluators.

### 655 **5 Conclusion**

656 Patients with peripheral neuropathy who have gait and balance problems with a high risk of falls  
657 including a history of falls improve their walking balance and decrease their fall rates from long-term  
658 use of a wearable sensory prosthesis.

659 **6 Acknowledgments**

660 We thank Lori Danzl, Alexandria Lloyd, Christine Olney (Minneapolis Department of Veterans  
661 Affairs Health Care System, Minneapolis, MN), Jackie Geiser, Tien Dat Nguyen, Delorianne Sander  
662 (M Health Fairview, Minneapolis, MN), Nathan Silver (Baylor College of Medicine, Houston, TX),  
663 Wanting Yu (Hinda and Arthur Marcus Institute for Aging Research, Hebrew SeniorLife, Roslindale,  
664 MA) for providing study coordination, participant recruitment and data gathering activities. We thank  
665 Amy Gravely, MA, for input on statistical analysis and Annette Xenopoulos-Oddsson (University of  
666 Minnesota, MN,), Dr. Lee Newcomer, and Dr. Steven Stern for reviewing drafts of the manuscript.  
667 The manuscript was published as a MedRxiv preprint.

668 **7 Contribution to the Field Statement**

669 Falls in older adults continues to be a large problem with few solutions. Falls are associated with  
670 enormous costs to society, individual suffering, and loss of quality of life. Peripheral neuropathy,  
671 leading to nerve damage, is recognized as an independent risk factor for falls and is often related to  
672 diabetes or chemotherapy treatment or is of unknown etiology. A common symptom involves  
673 numbness and sensory loss in the feet that can directly cause falls. Here we report data after extended  
674 long-term daily use of a wearable sensory prosthesis (Walkasins<sup>®</sup>, RxFunction Inc., MN, USA) from  
675 the multi-site clinical trial, walk2Wellness. The device provides directional tactile stimuli around the  
676 ankle during standing and walking activities, reflecting changes in foot pressure related to balance.  
677 Patients can then “feel” their feet in contact with the ground and notice body sway during standing  
678 because the device replaces related aspects of their impaired afferent nerve function. Data after 26  
679 weeks of use shows that previously reported improvements in clinical outcomes after 10 weeks of  
680 use are sustained. In addition, we can now report a decrease in fall rate in individuals who reported  
681 falling six months prior to participating in the study.



682 **8 References**

- 683 Alexandre, N. M., M. Nordin, R. Hiebert and M. Campello (2002). "Predictors of compliance with  
684 short-term treatment among patients with back pain." *Rev Panam Salud Publica* **12**(2): 86-94.
- 685 Algina, J, H. J. Keselman and R. D. Penfield (2005). "Effect Sizes and their Intervals: The Two-  
686 Level Repeated Measures Case." *Edu Psych Meas* **65**(April): 241–258.
- 687 Askew, R. L., K. F. Cook, D. A. Revicki, D. Cella and D. Amtmann (2016). "Evidence from diverse  
688 clinical populations supported clinical validity of PROMIS pain interference and pain behavior." *J*  
689 *Clin Epidemiol* **73**: 103-111.
- 690 Bao, T., W. J. Carender, C. Kinnaird, V. J. Barone, G. Peethambaran, S. L. Whitney, M. Kabeto, R.  
691 D. Seidler and K. H. Sienko (2018). "Effects of long-term balance training with vibrotactile sensory  
692 augmentation among community-dwelling healthy older adults: a randomized preliminary study." *J*  
693 *Neuroeng Rehabil* **15**(1): 5.
- 694 Bao, T., F. Noohi, C. Kinnaird, W. J. Carender, V. J. Barone, G. Peethambaran, S. L. Whitney, R. D.  
695 Seidler and K. H. Sienko (2022). "Retention Effects of Long-Term Balance Training with  
696 Vibrotactile Sensory Augmentation in Healthy Older Adults." *Sensors (Basel)* **22**(8).
- 697 Beninato, M., A. Fernandes and L. S. Plummer (2014). "Minimal clinically important difference of  
698 the functional gait assessment in older adults." *Phys Ther* **94**(11): 1594-1603.
- 699 Bergen, G., M. R. Stevens and E. R. Burns (2016). "Falls and Fall Injuries Among Adults Aged ≥65  
700 Years - United States, 2014." *MMWR Morb Mortal Wkly Rep* **65**(37): 993-998.
- 701 Buracchio, T., H. H. Dodge, D. Howieson, D. Wasserman and J. Kaye (2010). "The trajectory of gait  
702 speed preceding mild cognitive impairment." *Arch Neurol* **67**(8): 980-986.
- 703 Cavanagh, P. R., J. A. Derr, J. S. Ulbrecht, R. E. Maser and T. J. Orchard (1992). "Problems with gait  
704 and posture in neuropathic patients with insulin-dependent diabetes mellitus." *Diabet Med* **9**(5): 469-  
705 474.
- 706 CDC. (2017). "STEADI - Older Adult Fall Prevention." Retrieved May 5, 2018, 2018, from  
707 <https://www.cdc.gov/steadi/materials.html>.
- 708 CDC. (2021). "Older Adult Fall Prevention." Retrieved November 1, 2021, 2021, from  
709 <https://www.cdc.gov/falls/facts.html>.
- 710 Cesari, M., S. B. Kritchevsky, B. W. Penninx, B. J. Nicklas, E. M. Simonsick, A. B. Newman, F. A.  
711 Tylavsky, J. S. Brach, S. Satterfield, D. C. Bauer, M. Visser, S. M. Rubin, T. B. Harris and M. Pahor  
712 (2005). "Prognostic value of usual gait speed in well-functioning older people--results from the  
713 Health, Aging and Body Composition Study." *J Am Geriatr Soc* **53**(10): 1675-1680.
- 714 Clark, D. J. (2015). "Automaticity of walking: functional significance, mechanisms, measurement  
715 and rehabilitation strategies." *Front Hum Neurosci* **9**: 246.
- 716 Clark, D. J., E. A. Christou, S. A. Ring, J. B. Williamson and L. Doty (2014). "Enhanced  
717 somatosensory feedback reduces prefrontal cortical activity during walking in older adults." *J*  
718 *Gerontol A Biol Sci Med Sci* **69**(11): 1422-1428.
- 719 Cohen, H. S., K. T. Kimball and A. S. Adams (2000). "Application of the vestibular disorders  
720 activities of daily living scale." *Laryngoscope* **110**(7): 1204-1209.
- 721 Cohen, J. (1988). *Statistical Power Analysis for the Behavioral Sciences*. New York, NY, Routledge  
722 Academic.
- 723 Cohen, M. A., J. Miller, X. Shi, J. Sandhu and L. A. Lipsitz (2015). "Prevention Program Lowered  
724 The Risk Of Falls And Decreased Claims For Long-Term Services Among Elder Participants."  
725 *Health Aff (Millwood)* **34**(6): 971-977.
- 726 Coste, J. and S. Montel (2017). "Placebo-related effects: a meta-narrative review of  
727 conceptualization, mechanisms and their relevance in rheumatology." *Rheumatology (Oxford)* **56**(3):  
728 334-343.

## Extended Effects of a Wearable Sensory Prosthesis

- 729 Cummings, S. R., M. C. Nevitt and S. Kidd (1988). "Forgetting falls. The limited accuracy of recall  
730 of falls in the elderly." *J Am Geriatr Soc* **36**(7): 613-616.
- 731 DeMott, T. K., J. K. Richardson, S. B. Thies and J. A. Ashton-Miller (2007). "Falls and gait  
732 characteristics among older persons with peripheral neuropathy." *Am J Phys Med Rehabil* **86**(2):  
733 125-132.
- 734 Dixon, C. J., T. Knight, E. Binns, B. Ihaka and D. O'Brien (2017). "Clinical measures of balance in  
735 people with type two diabetes: A systematic literature review." *Gait Posture* **58**: 325-332.
- 736 Dumurgier, J., A. Elbaz, P. Ducimetière, B. Tavernier, A. Alépérovitch and C. Tzourio (2009). "Slow  
737 walking speed and cardiovascular death in well functioning older adults: prospective cohort study."  
738 *BMJ* **339**: b4460.
- 739 Enck, P., U. Bingel, M. Schedlowski and W. Rief (2013). "The placebo response in medicine:  
740 minimize, maximize or personalize?" *Nat Rev Drug Discov* **12**(3): 191-204.
- 741 Fallon, J. B., L. R. Bent, P. A. McNulty and V. G. Macefield (2005). "Evidence for strong synaptic  
742 coupling between single tactile afferents from the sole of the foot and motoneurons supplying leg  
743 muscles." *J Neurophysiol* **94**(6): 3795-3804.
- 744 Finnis, D. G., T. J. Kaptchuk, F. Miller and F. Benedetti (2010). "Biological, clinical, and ethical  
745 advances of placebo effects." *Lancet* **375**(9715): 686-695.
- 746 Ganz, D. A. and N. K. Latham (2020). "Prevention of Falls in Community-Dwelling Older Adults."  
747 *N Engl J Med* **382**(8): 734-743.
- 748 Gill, T. M., S. Bhasin, D. B. Reuben, N. K. Latham, K. Araujo, D. A. Ganz, C. Boult, A. W. Wu, J.  
749 Magaziner, N. Alexander, R. B. Wallace, M. E. Miller, T. G. Trivison, S. L. Greenspan, J. H.  
750 Gurwitz, J. Rich, E. Volpi, S. C. Waring, T. M. Manini, L. C. Min, J. Teresi, P. C. Dykes, S.  
751 McMahon, J. M. McGloin, E. A. Skokos, P. Charpentier, S. Basaria, P. W. Duncan, T. W. Storer, P.  
752 Gazarian, H. G. Allore, J. Dziura, D. Esserman, M. B. Carnie, C. Hanson, F. Ko, N. M. Resnick, J.  
753 Wiggins, C. Lu, C. Meng, L. Goehring, M. Fagan, R. Correa-de-Araujo, C. Casteel, P. Peduzzi and  
754 E. J. Greene (2021). "Effect of a Multifactorial Fall Injury Prevention Intervention on Patient Well-  
755 Being: The STRIDE Study." *J Am Geriatr Soc* **69**(1): 173-179.
- 756 Gregg, E. W., P. Sorlie, R. Paulose-Ram, Q. Gu, M. S. Eberhardt, M. Wolz, V. Burt, L. Curtin, M.  
757 Engelgau, L. Geiss and -. n. h. a. n. e. survey (2004). "Prevalence of lower-extremity disease in the  
758 US adult population  $\geq 40$  years of age with and without diabetes: 1999-2000 national health and  
759 nutrition examination survey." *Diabetes Care* **27**(7): 1591-1597.
- 760 Guertin, P. A. (2012). "Central pattern generator for locomotion: anatomical, physiological, and  
761 pathophysiological considerations." *Front Neurol* **3**: 183.
- 762 Hadjistavropoulos, T., K. Delbaere and T. D. Fitzgerald (2011). "Reconceptualizing the role of fear  
763 of falling and balance confidence in fall risk." *J Aging Health* **23**(1): 3-23.
- 764 Hahn, E. A., J. L. Beaumont, P. A. Pilkonis, S. F. Garcia, S. Magasi, D. A. DeWalt and D. Cella  
765 (2016). "The PROMIS satisfaction with social participation measures demonstrated responsiveness in  
766 diverse clinical populations." *J Clin Epidemiol* **73**: 135-141.
- 767 Hahn, E. A., D. A. DeWalt, R. K. Bode, S. F. Garcia, R. F. DeVellis, H. Correia, D. Cella and P. C.  
768 Group (2014). "New English and Spanish social health measures will facilitate evaluating health  
769 determinants." *Health Psychol* **33**(5): 490-499.
- 770 Hahn, E. A., M. A. Kallen, R. E. Jensen, A. L. Potosky, C. M. Moinpour, M. Ramirez, D. Cella and  
771 J. A. Teresi (2016). "Measuring social function in diverse cancer populations: Evaluation of  
772 measurement equivalence of the Patient Reported Outcomes Measurement Information System."  
773 *Psychol Test Assess Model* **58**(2): 403-421.
- 774 Halvarsson, A., E. Franzén, E. Farén, E. Olsson, L. Oddsson and A. Ståhle (2013). "Long-term  
775 effects of new progressive group balance training for elderly people with increased risk of falling - a  
776 randomized controlled trial." *Clin Rehabil* **27**(5): 450-458.

## Extended Effects of a Wearable Sensory Prosthesis

- 777 Hanewinkel, R., J. Drenthen, V. J. A. Verlinden, S. K. L. Darweesh, J. N. van der Geest, A.  
778 Hofman, P. A. van Doorn and M. A. Ikram (2017). "Polyneuropathy relates to impairment in daily  
779 activities, worse gait, and fall-related injuries." *Neurology* **89**(1): 76-83.
- 780 Hannan, M. T., M. M. Gagnon, J. Aneja, R. N. Jones, L. A. Cupples, L. A. Lipsitz, E. J. Samelson, S.  
781 G. Leveille and D. P. Kiel (2010). "Optimizing the tracking of falls in studies of older participants:  
782 comparison of quarterly telephone recall with monthly falls calendars in the MOBILIZE Boston  
783 Study." *Am J Epidemiol* **171**(9): 1031-1036.
- 784 Hardy, S. E., S. Perera, Y. F. Roumani, J. M. Chandler and S. A. Studenski (2007). "Improvement in  
785 usual gait speed predicts better survival in older adults." *J Am Geriatr Soc* **55**(11): 1727-1734.
- 786 Hart, D. A. (2021). "Learning From Human Responses to Deconditioning Environments: Improved  
787 Understanding of the "Use It or Lose It" Principle." *Front Sports Act Living* **3**: 685845.
- 788 Hicks, C. W., D. Wang, B. G. Windham, K. Matsushita and E. Selvin (2021). "Prevalence of  
789 peripheral neuropathy defined by monofilament insensitivity in middle-aged and older adults in two  
790 US cohorts." *Sci Rep* **11**(1): 19159.
- 791 Hoffman, E. M., N. P. Staff, J. M. Robb, J. L. St Sauver, P. J. Dyck and C. J. Klein (2015).  
792 "Impairments and comorbidities of polyneuropathy revealed by population-based analyses."  
793 *Neurology* **84**(16): 1644-1651.
- 794 Hsu, C. L., I. Iloputaife, L. Oddsson, B. Manor and L. Lipsitz (2021). "Six-Month Lower-Leg  
795 Sensory Stimulation Augments Neural Network Connectivity Associated With Improved Gait."  
796 *Innovation in aging* **5**(Suppl 1): 960-961.
- 797 Ites, K. I., E. J. Anderson, M. L. Cahill, J. A. Kearney, E. C. Post and L. S. Gilchrist (2011). "Balance  
798 interventions for diabetic peripheral neuropathy: a systematic review." *J Geriatr Phys Ther* **34**(3):  
799 109-116.
- 800 Kim, D. H., R. J. Glynn, J. Avorn, L. A. Lipsitz, K. Rockwood, A. Pawar and S. Schneeweiss (2019).  
801 "Validation of a Claims-Based Frailty Index Against Physical Performance and Adverse Health  
802 Outcomes in the Health and Retirement Study." *J Gerontol A Biol Sci Med Sci* **74**(8): 1271-1276.
- 803 Koehler-McNicholas, S. R., L. Danzl, A. Y. Cataldo and L. I. E. Oddsson (2019). "Neuromodulation  
804 to improve gait and balance function using a sensory neuroprosthesis in people who report insensate  
805 feet - A randomized control cross-over study." *PLoS One* **14**(4): e0216212.
- 806 Komatsu, H., K. Yagasaki, Y. Komatsu, H. Yamauchi, T. Yamauchi, T. Shimokawa and A. Z.  
807 Doorenbos (2019). "Falls and Functional Impairments in Breast Cancer Patients with Chemotherapy-  
808 Induced Peripheral Neuropathy." *Asia Pac J Oncol Nurs* **6**(3): 253-260.
- 809 Koski, K., H. Luukinen, P. Laippala and S. L. Kivelä (1998). "Risk factors for major injurious falls  
810 among the home-dwelling elderly by functional abilities. A prospective population-based study."  
811 *Gerontology* **44**(4): 232-238.
- 812 Kroenke, K., R. L. Spitzer and J. B. Williams (2001). "The PHQ-9: validity of a brief depression  
813 severity measure." *J Gen Intern Med* **16**(9): 606-613.
- 814 Kruse, R. L., J. W. Lemaster and R. W. Madsen (2010). "Fall and balance outcomes after an  
815 intervention to promote leg strength, balance, and walking in people with diabetic peripheral  
816 neuropathy: "feet first" randomized controlled trial." *Phys Ther* **90**(11): 1568-1579.
- 817 Kästenbauer, T., S. Sauseng, H. Brath, H. Abrahamian and K. Irsigler (2004). "The value of the  
818 Rydel-Seiffer tuning fork as a predictor of diabetic polyneuropathy compared with a  
819 neurothesiometer." *Diabet Med* **21**(6): 563-567.
- 820 Lajoie, Y. and S. P. Gallagher (2004). "Predicting falls within the elderly community: comparison of  
821 postural sway, reaction time, the Berg balance scale and the Activities-specific Balance Confidence  
822 (ABC) scale for comparing fallers and non-fallers." *Arch Gerontol Geriatr* **38**(1): 11-26.
- 823 Lakens, D. (2013). "Calculating and reporting effect sizes to facilitate cumulative science: a practical  
824 primer for t-tests and ANOVAs." *Front Psychol* **4**: 863.

## Extended Effects of a Wearable Sensory Prosthesis

- 825 Li, F., P. Harmer, K. J. Fisher, E. McAuley, N. Chaumeton, E. Eckstrom and N. L. Wilson (2005).  
826 "Tai Chi and fall reductions in older adults: a randomized controlled trial." J Gerontol A Biol Sci  
827 Med Sci **60**(2): 187-194.
- 828 Li, L. and B. Manor (2010). "Long term Tai Chi exercise improves physical performance among  
829 people with peripheral neuropathy." Am J Chin Med **38**(3): 449-459.
- 830 Lipsitz, L. A., E. A. Macklin, T. G. Trivison, B. Manor, P. Gagnon, T. Tsai, I. I. Aizpurúa, O. Y. Lo  
831 and P. M. Wayne (2019). "A Cluster Randomized Trial of Tai Chi vs Health Education in Subsidized  
832 Housing: The MI-WiSH Study." J Am Geriatr Soc **67**(9): 1812-1819.
- 833 Lipsitz, L. A., B. Manor, D. Habtemariam, I. Iloputaife, J. Zhou and T. G. Trivison (2018). "The  
834 pace and prognosis of peripheral sensory loss in advanced age: association with gait speed and falls."  
835 BMC Geriatr **18**(1): 274.
- 836 Manor, B., M. Lough, M. M. Gagnon, A. Cupples, P. M. Wayne and L. A. Lipsitz (2014).  
837 "Functional benefits of tai chi training in senior housing facilities." J Am Geriatr Soc **62**(8): 1484-  
838 1489.
- 839 Mathias, S., U. S. Nayak and B. Isaacs (1986). "Balance in elderly patients: the "get-up and go" test."  
840 Arch Phys Med Rehabil **67**(6): 387-389.
- 841 Melzer, I. and L. I. e. Oddsson (2013). "Improving balance control and self-reported lower extremity  
842 function in community-dwelling older adults: a randomized control trial." Clin Rehabil **27**(3): 195-  
843 206.
- 844 Menz, H. B., S. R. Lord, R. St George and R. C. Fitzpatrick (2004). "Walking stability and  
845 sensorimotor function in older people with diabetic peripheral neuropathy." Arch Phys Med Rehabil  
846 **85**(2): 245-252.
- 847 Meyer, P. F., L. I. Oddsson and C. J. De Luca (2004). "Reduced plantar sensitivity alters postural  
848 responses to lateral perturbations of balance." Exp Brain Res **157**(4): 526-536.
- 849 Meyer, P. F., L. I. Oddsson and C. J. De Luca (2004). "The role of plantar cutaneous sensation in  
850 unperturbed stance." Exp Brain Res **156**(4): 505-512.
- 851 Montero-Odasso, M., M. Schapira, E. R. Soriano, M. Varela, R. Kaplan, L. A. Camera and L. M.  
852 Mayorga (2005). "Gait velocity as a single predictor of adverse events in healthy seniors aged 75  
853 years and older." J Gerontol A Biol Sci Med Sci **60**(10): 1304-1309.
- 854 Montero-Odasso, M. M., N. Kamkar, F. Pieruccini-Faria, A. Osman, Y. Sarquis-Adamson, J. Close,  
855 D. B. Hogan, S. W. Hunter, R. A. Kenny, L. A. Lipsitz, S. R. Lord, K. M. Madden, M. Petrovic, J.  
856 Ryg, M. Speechley, M. Sultana, M. P. Tan, N. van der Velde, J. Verghese, T. Masud and T. F. o. G.  
857 G. f. F. i. O. Adults (2021). "Evaluation of Clinical Practice Guidelines on Fall Prevention and  
858 Management for Older Adults: A Systematic Review." JAMA Netw Open **4**(12): e2138911.
- 859 Moore, J. L., K. Potter, K. Blankshain, S. L. Kaplan, L. C. O'Dwyer and J. E. Sullivan (2018). "A  
860 Core Set of Outcome Measures for Adults With Neurologic Conditions Undergoing Rehabilitation: A  
861 CLINICAL PRACTICE GUIDELINE." J Neurol Phys Ther **42**(3): 174-220.
- 862 Moreland, B., R. Kakara and A. Henry (2020). "Trends in Nonfatal Falls and Fall-Related Injuries  
863 Among Adults Aged  $\geq 65$  Years - United States, 2012-2018." MMWR Morb Mortal Wkly Rep  
864 **69**(27): 875-881.
- 865 Morris, S. B. and R. P. DeShon (2002). "Combining effect size estimates in meta-analysis with  
866 repeated measures and independent-groups designs." Psychol Methods **7**(1): 105-125.
- 867 Morrison, S., R. Simmons, S. R. Colberg, H. K. Parson and A. I. Vinik (2018). "Supervised Balance  
868 Training and Wii Fit-Based Exercises Lower Falls Risk in Older Adults With Type 2 Diabetes." J  
869 Am Med Dir Assoc **19**(2): 185.e187-185.e113.
- 870 Mustapa, A., M. Justine, N. Mohd Mustafah, N. Jamil and H. Manaf (2016). "Postural Control and  
871 Gait Performance in the Diabetic Peripheral Neuropathy: A Systematic Review." Biomed Res Int  
872 **2016**: 9305025.



## Extended Effects of a Wearable Sensory Prosthesis

- 873 Noohi, F., C. Kinnaird, Y. DeDios, I. S. Kofman, S. Wood, J. Bloomberg, A. Mulavara and R.  
874 Seidler (2017). "Functional Brain Activation in Response to a Clinical Vestibular Test Correlates  
875 with Balance." *Front Syst Neurosci* **11**: 11.
- 876 Oddsson, L. I. E., T. Bisson, H. S. Cohen, L. Jacobs, M. Khoshnoodi, D. Kung, L. A. Lipsitz, B.  
877 Manor, P. McCracken, Y. Rumsey, D. M. Wrisley and S. R. Koehler-McNicholas (2020). "The  
878 Effects of a Wearable Sensory Prosthesis on Gait and Balance Function After 10 Weeks of Use in  
879 Persons With Peripheral Neuropathy and High Fall Risk - The walk2Wellness Trial." *Front Aging*  
880 *Neurosci* **12**: 592751.
- 881 Oddsson, L. I. E., P. Boissy and I. Melzer (2007). "How to improve gait and balance function in  
882 elderly individuals—compliance with principles of training." *Eur Rev Aging Phys Act* **Volume**  
883 **4**(Issue 1): 15-23.
- 884 Patsopoulos, N. A. (2011). "A pragmatic view on pragmatic trials." *Dialogues Clin Neurosci* **13**(2):  
885 217-224.
- 886 Paul, S. S., L. Ada and C. G. Canning (2005). "Automaticity of walking – implications for  
887 physiotherapy practice." *Physical Therapy Reviews* **10**(1): 15-23.
- 888 Perera, S., S. H. Mody, R. C. Woodman and S. A. Studenski (2006). "Meaningful change and  
889 responsiveness in common physical performance measures in older adults." *J Am Geriatr Soc* **54**(5):  
890 743-749.
- 891 Powell, L. E. and A. M. Myers (1995). "The Activities-specific Balance Confidence (ABC) Scale." *J*  
892 *Gerontol A Biol Sci Med Sci* **50A**(1): M28-34.
- 893 Quigley, P. A., T. Bulat, B. Schulz, Y. Friedman, S. Hart-Hughes, J. K. Richardson and S. Barnett  
894 (2014). "Exercise interventions, gait, and balance in older subjects with distal symmetric  
895 polyneuropathy: a three-group randomized clinical trial." *Am J Phys Med Rehabil* **93**(1): 1-12; quiz  
896 13-16.
- 897 Reeves, N. D., G. Orlando and S. J. Brown (2021). "Sensory-Motor Mechanisms Increasing Falls  
898 Risk in Diabetic Peripheral Neuropathy." *Medicina (Kaunas)* **57**(5).
- 899 Richardson, J. K. and E. A. Hurvitz (1995). "Peripheral neuropathy: a true risk factor for falls." *J*  
900 *Gerontol A Biol Sci Med Sci* **50**(4): M211-215.
- 901 Richardson, J. K., D. Sandman and S. Vela (2001). "A focused exercise regimen improves clinical  
902 measures of balance in patients with peripheral neuropathy." *Arch Phys Med Rehabil* **82**(2): 205-209.
- 903 Riskowski, J. L., L. Quach, B. Manor, H. B. Menz, L. A. Lipsitz and M. T. Hannan (2012).  
904 "Idiopathic peripheral neuropathy increases fall risk in a population-based cohort study of older  
905 adults." *Journal of Foot and Ankle Research* **5**(1): P19.
- 906 Sheldon, J. H. (1948). "Some aspects of old age." *Lancet* **1**(6504): 621-624.
- 907 Shumway-Cook, A., W. Gruber, M. Baldwin and S. Liao (1997). "The effect of multidimensional  
908 exercises on balance, mobility, and fall risk in community-dwelling older adults." *Phys Ther* **77**(1):  
909 46-57.
- 910 Sienko, K. H., R. D. Seidler, W. J. Carender, A. D. Goodworth, S. L. Whitney and R. J. Peterka  
911 (2018). "Potential Mechanisms of Sensory Augmentation Systems on Human Balance Control." *Front Neurol* **9**: 944.
- 912 Sluijs, E. M., G. J. Kok and J. van der Zee (1993). "Correlates of exercise compliance in physical  
913 therapy." *Phys Ther* **73**(11): 771-782; discussion 783-776.
- 914 Soh, S. L., C. W. Tan, J. I. Thomas, G. Tan, T. Xu, Y. L. Ng and J. Lane (2021). "Falls efficacy:  
915 Extending the understanding of self-efficacy in older adults towards managing falls." *J Frailty*  
916 *Sarcopenia Falls* **6**(3): 131-138.
- 917 Srinivasan, S. S., G. Tuckute, J. Zou, S. Gutierrez-Arango, H. Song, R. L. Barry and H. M. Herr  
918 (2020). "Agonist-antagonist myoneural interface amputation preserves proprioceptive sensorimotor  
919 neurophysiology in lower limbs." *Sci Transl Med* **12**(573).
- 920

## Extended Effects of a Wearable Sensory Prosthesis

- 921 STEADI, C.-. (2021). "STEADI—Older Adult Fall Prevention." July 26, 2021. Retrieved December  
922 10, 2021, 2021, from <https://www.cdc.gov/steady/>.
- 923 Stevens, J. A. and E. A. Phelan (2013). "Development of STEADI: a fall prevention resource for  
924 health care providers." *Health Promot Pract* **14**(5): 706-714.
- 925 Streckmann, F., E. M. Zopf, H. C. Lehmann, K. May, J. Rizza, P. Zimmer, A. Gollhofer, W. Bloch  
926 and F. T. Baumann (2014). "Exercise intervention studies in patients with peripheral neuropathy: a  
927 systematic review." *Sports Med* **44**(9): 1289-1304.
- 928 Strzalkowski, N. D. J., R. M. Peters, J. T. Inglis and L. R. Bent (2018). "Cutaneous afferent  
929 innervation of the human foot sole: what can we learn from single-unit recordings?" *J Neurophysiol*  
930 **120**(3): 1233-1246.
- 931 Studenski, S., S. Perera, K. Patel, C. Rosano, K. Faulkner, M. Inzitari, J. Brach, J. Chandler, P.  
932 Cawthon, E. B. Connor, M. Nevitt, M. Visser, S. Kritchevsky, S. Badinelli, T. Harris, A. B.  
933 Newman, J. Cauley, L. Ferrucci and J. Guralnik (2011). "Gait speed and survival in older adults."  
934 *JAMA* **305**(1): 50-58.
- 935 Studenski, S., S. Perera, D. Wallace, J. M. Chandler, P. W. Duncan, E. Rooney, M. Fox and J. M.  
936 Guralnik (2003). "Physical performance measures in the clinical setting." *J Am Geriatr Soc* **51**(3):  
937 314-322.
- 938 Tinetti, M. E. and C. Kumar (2010). "The patient who falls: "It's always a trade-off"." *JAMA* **303**(3):  
939 258-266.
- 940 Toftagen, C., C. Visovsky and D. L. Berry (2012). "Strength and balance training for adults with  
941 peripheral neuropathy and high risk of fall: current evidence and implications for future research."  
942 *Oncol Nurs Forum* **39**(5): E416-424.
- 943 Uitenbroek, D. G. (1997). "SISA-Binomial." Retrieved May, 2020, from  
944 <https://www.quantitativeskills.com/sisa/calculations/bonfer.htm>.
- 945 van Waart, H., M. M. Stuiver, W. H. van Harten, E. Geleijn, J. M. Kieffer, L. M. Buffart, M. de  
946 Maaker-Berkhof, E. Boven, J. Schrama, M. M. Geenen, J. M. Meerum Terwogt, A. van Bochove, V.  
947 Lustig, S. M. van den Heiligenberg, C. H. Smorenburg, J. A. Hellendoorn-van Vreeswijk, G. S.  
948 Sonke and N. K. Aaronson (2015). "Effect of Low-Intensity Physical Activity and Moderate- to  
949 High-Intensity Physical Exercise During Adjuvant Chemotherapy on Physical Fitness, Fatigue, and  
950 Chemotherapy Completion Rates: Results of the PACES Randomized Clinical Trial." *J Clin Oncol*  
951 **33**(17): 1918-1927.
- 952 Vaughan, G. M. (2021). "The roles of mechanoreceptors in muscle and skin in human  
953 proprioception." *Current Opinion in Physiology* **21**: 48-56.
- 954 Vinik, A. I., P. Camacho, S. Reddy, W. M. Valencia, D. Trence, A. M. Matsumoto and J. E. Morley  
955 (2017). "AGING, DIABETES, AND FALLS." *Endocr Pract* **23**(9): 1117-1139.
- 956 Wang, C., R. Goel, Q. Zhang, B. Lepow and B. Najafi (2019). "Daily Use of Bilateral Custom-Made  
957 Ankle-Foot Orthoses for Fall Prevention in Older Adults: A Randomized Controlled Trial." *J Am*  
958 *Geriatr Soc* **67**(8): 1656-1661.
- 959 Winters-Stone, K. M., F. Horak, P. G. Jacobs, P. Trubowitz, N. F. Dieckmann, S. Stoyles and S.  
960 Faithfull (2017). "Falls, Functioning, and Disability Among Women With Persistent Symptoms of  
961 Chemotherapy-Induced Peripheral Neuropathy." *J Clin Oncol* **35**(23): 2604-2612.
- 962 Wolf, B., H. Feys, De Weerd, J. van der Meer, M. Noom and G. Aufdemkampe (2001). "Effect of a  
963 physical therapeutic intervention for balance problems in the elderly: a single-blind, randomized,  
964 controlled multicentre trial." *Clin Rehabil* **15**(6): 624-636.
- 965 Wolf, S. L., R. W. Sattin, M. Kutner, M. O'Grady, A. I. Greenspan and R. J. Gregor (2003). "Intense  
966 tai chi exercise training and fall occurrences in older, transitionally frail adults: a randomized,  
967 controlled trial." *J Am Geriatr Soc* **51**(12): 1693-1701.

## Extended Effects of a Wearable Sensory Prosthesis

- 968 Wrisley, D. M. and N. A. Kumar (2010). "Functional gait assessment: concurrent, discriminative, and  
969 predictive validity in community-dwelling older adults." Phys Ther **90**(5): 761-773.
- 970 Wrisley, D. M., G. F. Marchetti, D. K. Kuharsky and S. L. Whitney (2004). "Reliability, internal  
971 consistency, and validity of data obtained with the functional gait assessment." Phys Ther **84**(10):  
972 906-918.
- 973 Wrisley, D. M., G. McLean, J. B. Hill and L. I. E. Oddsson (2021). "Long-Term Use of a Sensory  
974 Prosthesis Improves Function in a Patient With Peripheral Neuropathy: A Case Report." Front Neurol  
975 **12**: 655963.
- 976 Zaiontz, C. (2020). "Real Statistics Resource Pack ( Release 6.8)." Release 6.8. from  
977 <http://www.real-statistics.com/>.  
978  
979

## Extended Effects of a Wearable Sensory Prosthesis

980

981 **Table 1.** Characteristics of the 44 individuals from the four different clinical sites enrolled in the study who reached 26  
 982 weeks of participation. Values represent Mean (Standard Deviation). #ChrD - Number of Chronic Diseases.  
 983

|                          | n  | Age (yrs)      | Height (m)     | Weight (kg)    | #ChrD        | FGA Score     | Gait Speed Self-selected (m/s) | Gait Speed Fast (m/s) | TUG (s)       | 4-Stage Balance Test (s) | ABC Score      |
|--------------------------|----|----------------|----------------|----------------|--------------|---------------|--------------------------------|-----------------------|---------------|--------------------------|----------------|
| <b>VAMC</b>              | 18 | 74.4<br>(6.0)  | 1.76<br>(0.07) | 96.9<br>(14.1) | 9.6<br>(2.3) | 15.4<br>(4.1) | 0.82<br>(0.13)                 | 1.27<br>(0.36)        | 13.5<br>(2.9) | 24.8<br>(7.4)            | 68.2<br>(15.8) |
| <b>Baylor</b>            | 11 | 74.6<br>(9.4)  | 1.75<br>(0.08) | 87.0<br>(15.2) | 8.2<br>(2.9) | 15.4<br>(4.5) | 0.88<br>(0.25)                 | 1.33<br>(0.39)        | 13.3<br>(6.3) | 28.1<br>(8.0)            | 55.6<br>(18.8) |
| <b>M Health Fairview</b> | 5  | 71.2<br>(10.7) | 1.75<br>(0.14) | 84.4<br>(12.0) | 6.8<br>(5.3) | 15.6<br>(2.1) | 1.07<br>(0.21)                 | 1.32<br>(0.20)        | 10.5<br>(1.4) | 26.4<br>(3.8)            | 64.1<br>(7.0)  |
| <b>Harvard</b>           | 10 | 71.5<br>(8.0)  | 1.76<br>(0.13) | 86.7<br>(16.9) | 6.6<br>(3.5) | 15.0<br>(3.0) | 0.95<br>(0.31)                 | 1.25<br>(0.45)        | 12.8<br>(3.3) | 25.3<br>(7.6)            | 60.8<br>(15.3) |

984

985

986

987

988

989

990

991



## Extended Effects of a Wearable Sensory Prosthesis

992 **Table 2.** Baseline characteristics for participants reaching the 26 Week assessment (n=44). Participants who reported  
 993 having fallen in the past six months (Pre-F) and those who did not (Pre-NF) are reported separately. Values represent  
 994 Mean (Standard Deviation). Column p-level shows significance level for comparison between the Pre-F and Pre-NF  
 995 groups. In bold if p<0.05.

996 \*Fall-risk factors assessed in the current study included, recent history of falls (Tinetti and Kumar 2010), PN diagnosis  
 997 (Richardson and Hurvitz 1995), FGA score<23 (Wrisley and Kumar 2010), TUG >12 s (CDC 2017), 4-Stage Balance  
 998 Test<30s (CDC 2017), Gait Speed <0.7m/s (Studenski, Perera et al. 2003, Montero-Odasso, Schapira et al. 2005), and  
 999 ABC score <67% (Lajoie and Gallagher 2004).

1000  
1001

| Baseline Assessment                     | All<br>n=44       | Pre-F<br>n=25     | Pre-NF<br>n=19    | p-level           |
|-----------------------------------------|-------------------|-------------------|-------------------|-------------------|
| Gender Female (n)                       | 8 of 44 (18%)     | 8 of 25 (32%)     | 0 of 19 (0%)      | <b>&lt;0.01</b>   |
| Use of Assistive Device (n)             | 25 of 44 (57%)    | 18 of 25 (72%)    | 7 of 19 (37%)     | <b>0.02</b>       |
| Gait Speed Self-selected <0.7m/s (n)    | 8 of 44 (18%)     | 7 of 25 (28%)     | 1 of 19 (5%)      | 0.052             |
| Timed Up and Go >12s (n)                | 21 of 44 (48%)    | 16 of 25 (64%)    | 5 of 19 (26%)     | <b>0.013</b>      |
| 4-Stage Balance Test <30s (n)           | 28 of 44 (64%)    | 18 of 25 (72%)    | 10 of 19 (53%)    | 0.19              |
| ABC Score <67% (n)                      | 24 of 44 (54%)    | 17 of 25 (68%)    | 7 of 19 (37%)     | <b>0.04</b>       |
| Fallen in Last 6 Months (n)             | 25 of 44 (57%)    | 25 of 25 (100%)   | 0 of 19 (0%)      | n/a               |
| Fallen in Last 12 Months (n)            | 31 of 44 (70%)    | 25 of 25 (100%)   | 6 of 19 (32%)     | <b>&lt;0.0001</b> |
| Number of Falls 6 Months                | 53                | 53                | 0                 | n/a               |
| Number of Falls 12 Months               | 106               | 97 of 106 (92%)   | 9 of 106 (8%)     | <b>&lt;0.0001</b> |
|                                         | Mean (SD)<br>n=44 | Mean (SD)<br>n=25 | Mean (SD)<br>n=19 | p-level           |
| Age (yrs)                               | 73.5 (7.8)        | 73.1 (7.9)        | 73.9 (7.8)        | 0.72              |
| Height (m)                              | 1.76 (0.09)       | 1.76 (0.12)       | 1.76 (0.05)       | 0.96              |
| Weight (kg)                             | 90.7 (15.3)       | 89.7 (17.3)       | 92.0 (12.5)       | 0.63              |
| BMI (kg/m <sup>2</sup> )                | 29.4 (4.6)        | 29.0 (5.2)        | 29.8 (3.8)        | 0.59              |
| FGA Score                               | 15.3 (3.7)        | 13.9 (3.4)        | 17.3 (3.3)        | <b>&lt;0.002</b>  |
| Gait Speed, Self-selected (m/s)         | 0.89 (0.23)       | 0.83 (0.23)       | 0.97 (0.21)       | <b>&lt;0.05</b>   |
| Gait Speed, Fast (m/s)                  | 1.29 (0.36)       | 1.13 (0.29)       | 1.50 (0.35)       | <b>&lt;0.0005</b> |
| TUG (s)                                 | 12.9 (4.0)        | 14.1 (4.4)        | 11.4 (2.8)        | <b>&lt;0.026</b>  |
| 4-Stage Balance Test (s)                | 25.9 (7.2)        | 24.5 (6.3)        | 27.8 (8.1)        | 0.14              |
| Fall-Risk Factors* (n of 7)             | 3.4 (1.5)         | 4.3 (0.9)         | 2.2 (1.1)         | <b>&lt;0.0001</b> |
| # Chronic Conditions                    | 8.3 (3.3)         | 8.8 (3.3)         | 7.5 (3.3)         | 0.21              |
| ABC Score (%)                           | 62.9 (16.2)       | 57.8 (14.0)       | 69.6 (16.8)       | <b>&lt;0.02</b>   |
| VADL Mean Score                         | 3.7 (1.10)        | 4.1 (1.0)         | 3.1 (0.8)         | <b>&lt;0.001</b>  |
| VAS Pain Score (0-10)                   | 2.9 (2.1)         | 3.0 (2.1)         | 2.8 (2.2)         | 0.89              |
| PHQ-9                                   | 4.7 (4.0)         | 5.7 (4.5)         | 3.3 (2.9)         | 0.052             |
| Pain Interference<br>PROMIS® 6b         | 50.9 (8.1)        | 52.7 (7.7)        | 48.5 (8.1)        | 0.09              |
| Satisfaction Social Roles<br>PROMIS® 8a | 49.8 (7.0)        | 49.8 (6.7)        | 49.9 (7.5)        | 0.96              |
| Ability to Participate<br>PROMIS® 8a    | 49.9 (7.4)        | 48.4 (6.7)        | 51.8 (8.0)        | 0.13              |

1002  
1003  
1004  
1005  
1006  
1007

## Extended Effects of a Wearable Sensory Prosthesis

1008 **Table 3.** Clinical outcomes and Rydel-Seiffer vibration sensation screening for the 30 individuals who were able to  
 1009 complete all in-person assessments at baseline and after 26 weeks as well as the subgroups of Pre-Fallers and Pre-  
 1010 NonFallers. Statistical significance is indicated in **bold**. Bonferroni’s adjustment of significance levels for correlated  
 1011 measures was applied (Uitenbroek 1997).

1012 Values in (italics) indicate Pearson’s correlation coefficient followed by the adjusted significance level required for an  
 1013 overall significance of 0.05 as marked with \*.

1014 Cohen’s  $d_{rm}$  indicates effect size for change between baseline and the primary endpoint 10 weeks where 0.2 is represents  
 1015 a small effect, 0.5 a medium effect, and 0.8 a large effect. Values in parenthesis show 95% confidence interval.  
 1016 “estimate the effect size for single-group pretest-posttest designs” (Morris and DeShon 2002)  
 1017

| <b>All</b>                     | <b>Baseline Mean (SD)<br/>n=30</b> | <b>26-week Mean (SD)<br/>n=30</b>   | <b>p-level</b>     | <b>Cohen’s <math>d_{rm}</math><br/>(95% CI’s)</b> |
|--------------------------------|------------------------------------|-------------------------------------|--------------------|---------------------------------------------------|
| FGA Score                      | 15.0 (3.9)                         | <b>19.2 (4.1)</b><br>(0.69) 0.036*  | <b>&lt;0.00001</b> | <b>1.38 (0.82-1.94)</b>                           |
| Gait Speed Self-selected (m/s) | 0.89 (0.26)                        | <b>0.97 (0.28)</b><br>(0.80) 0.040* | <b>0.02</b>        | <b>0.49 (-0.03-1.0)</b>                           |
| Gait Speed Fast (m/s)          | 1.30 (0.41)                        | 1.37 (0.42)                         | 0.07               | n/a                                               |
| TUG (s)                        | 13.2 (4.6)                         | 12.3 (3.4)                          | 0.20               | n/a                                               |
| 4-Stage Balance Test (s)       | 25.6 (7.2)                         | <b>28.4 (5.7)</b><br>(0.65) 0.034*  | <b>&lt;0.01</b>    | <b>0.47 (-0.05-0.98)</b>                          |
| R/L 1st MTP Joint              | 2.8 (2.5)                          | 2.2 (2.4)                           | 0.07               | n/a                                               |
| R/L Lateral Malleolus          | 3.8 (2.2)                          | <b>3.2 (2.1)</b><br>(0.60) 0.032*   | <b>0.032</b>       | <b>0.32 (-0.19-0.83)</b>                          |
| R/L Patella                    | 4.0 (2.2)                          | 4.0 (1.8)                           | 0.91               | n/a                                               |
| <b>Pre-Fallers</b>             | <b>Baseline Mean (SD)<br/>n=18</b> | <b>26-week Mean (SD)<br/>n=18</b>   | <b>p-level</b>     | <b>Cohen’s <math>d_{rm}</math><br/>(95% CI’s)</b> |
| FGA Score                      | 13.7 (3.7)                         | <b>18.1 (3.6)</b><br>(0.72) 0.037*  | <b>&lt;0.0001</b>  | <b>1.58 (0.83-2.33)</b>                           |
| Gait Speed Self-selected (m/s) | 0.82 (0.25)                        | 0.90 (0.29)                         | 0.12               | n/a                                               |
| Gait Speed Fast (m/s)          | 1.13 (0.33)                        | 1.23 (0.37)                         | 0.07               | n/a                                               |
| TUG (s)                        | 14.5 (5.0)                         | 13.0 (3.9)                          | 0.14               | n/a                                               |
| 4-Stage Balance Test (s)       | 23.5 (6.5)                         | <b>27.7 (5.4)</b><br>(0.69) 0.037*  | <b>&lt;0.02</b>    | <b>0.82 (0.14-1.50)</b>                           |
| R/L 1st MTP Joint              | 2.9 (2.4)                          | <b>1.8 (2.0)</b><br>(0.55) 0.03*    | <b>0.005</b>       | <b>0.58 (-0.09-1.24)</b>                          |
| R/L Lateral Malleolus          | 3.75 (2.1)                         | 3.25 (1.9)                          | 0.07               | n/a                                               |
| R/L Patella                    | 4.2 (2.0)                          | 4.0 (1.9)                           | 0.64               | n/a                                               |
| <b>Pre-NonFallers</b>          | <b>Baseline Mean (SD)<br/>n=12</b> | <b>26-week Mean (SD)<br/>n=12</b>   | <b>p-level</b>     | <b>Cohen’s <math>d_{rm}</math><br/>(95% CI’s)</b> |
| FGA Score                      | 17.0 (3.3)                         | <b>20.8 (4.3)</b><br>(0.56) 0.031*  | <b>0.004</b>       | <b>1.23 (0.36-2.10)</b>                           |
| Gait Speed Self-selected (m/s) | 1.00(0.25)                         | 1.08 (0.25)                         | 0.06               | n/a                                               |
| Gait Speed Fast (m/s)          | 1.56 (0.40)                        | 1.59 (0.42)                         | 0.63               | n/a                                               |
| TUG (s)                        | 11.1 (3.1)                         | 11.3 (2.5)                          | 0.78               | n/a                                               |
| 4-Stage Balance Test (s)       | 28.7 (7.4)                         | 29.5 (6.1)                          | 0.65               | n/a                                               |
| R/L 1st MTP Joint              | 2.5 (2.8)                          | 2.7 (2.8)                           | 0.76               | n/a                                               |
| R/L Lateral Malleolus          | 3.7 (2.5)                          | 3.1 (2.4)                           | 0.21               | n/a                                               |
| R/L Patella                    | 3.7 (2.5)                          | 4.0 (1.7)                           | 0.68               | n/a                                               |

1018

## Extended Effects of a Wearable Sensory Prosthesis

1019 **Table 4.** Results from self-reported outcomes for the 44 individuals who completed all assessments. Data are shown  
 1020 separately for the group as a whole and for Pre-Fallers (having reported fallen in the prior 6 months) and Pre-NonFallers  
 1021 (no falls reported in the prior 6 months).  
 1022

|                                      | <b>Baseline Mean (SD)<br/>n=44</b> | <b>26-week Mean (SD)<br/>n=44</b> | <b>p-level</b>  |
|--------------------------------------|------------------------------------|-----------------------------------|-----------------|
| ABC-Score (%)                        | 62.9 (16.2)                        | 65.1 (14.8)                       | 0.39            |
| VADL Mean Score                      | 3.70 (1.06)                        | 3.46 (1.10)                       | 0.08            |
| VAS Score (0-10)                     | 2.9 (2.1)                          | 2.8 (2.2)                         | 0.66            |
| PHQ-9                                | 4.7 (4.0)                          | 3.9 (4.2)                         | 0.14            |
| Pain Interference PROMIS® 6b         | 50.9 (8.1)                         | 51.1 (8.3)                        | 0.88            |
| Satisfaction Social Roles PROMIS® 8a | 49.8 (7.0)                         | 51.9 (8.3)                        | 0.075           |
| Ability to Participate PROMIS® 8a    | 49.9 (7.4)                         | 52.6 (8.6)                        | <b>&lt;0.05</b> |
| <b>Pre-Fallers (n=25)</b>            | <b>Baseline Mean (SD)</b>          | <b>26-week Mean (SD)</b>          |                 |
| ABC-Score (%)                        | 57.8 (13.9)                        | 59.1 (14.4)                       | 0.73            |
| VADL Mean Score                      | 4.14 (1.00)                        | 3.95 (0.79)                       | 0.32            |
| VAS Score (0-10)                     | 3.0 (2.1)                          | 3.1 (1.9)                         | 0.76            |
| PHQ-9                                | 5.7 (4.7)                          | 5.1 (4.5)                         | 0.22            |
| Pain Interference PROMIS® 6b         | 52.7 (8.0)                         | 52.9 (7.3)                        | 0.86            |
| Satisfaction Social Roles PROMIS® 8a | 49.8 (6.7)                         | 49.2 (6.8)                        | 0.69            |
| Ability to Participate PROMIS® 8a    | 48.4 (7.1)                         | 50.0 (7.1)                        | 0.12            |
| <b>Pre-NonFallers (n=19)</b>         | <b>Baseline Mean (SD)</b>          | <b>26-week Mean (SD)</b>          |                 |
| ABC-Score (%)                        | 69.6 (17.1)                        | 73.0 (12.0)                       | 0.34            |
| VADL Mean Score                      | 3.11 (0.86)                        | 2.81 (1.00)                       | 0.14            |
| VAS Score (0-10)                     | 2.8 (2.2)                          | 2.4 (2.4)                         | 0.35            |
| PHQ-9                                | 3.3 (2.9)                          | 2.4 (3.5)                         | 0.35            |
| Pain Interference PROMIS® 6b         | 48.5 (8.1)                         | 48.6 (9.2)                        | 0.96            |
| Satisfaction Social Roles PROMIS® 8a | 49.9 (7.7)                         | 55.5 (8.9)                        | <b>0.006</b>    |
| Ability to Participate PROMIS® 8a    | 51.8 (7.5)                         | 55.0 (10.0)                       | 0.18            |

1023  
 1024  
 1025

## Extended Effects of a Wearable Sensory Prosthesis

1026 **Table 5.** Parameters related to falls and fall risk assessed at baseline and at 26 weeks. All 44 individuals were asked to  
 1027 report their falls throughout the 26-week period. Data for Pre-Fallers and Pre-NonFallers are presented separately. Fall  
 1028 rates are reported in number of falls per 1000 patient days. Fall rates were not normally distributed (Shapiro–Wilk W-stat  
 1029 =0.82).  
 1030 \*Wilcoxon Signed Rank test.  
 1031

| <b>All (n=44)</b>                                              | <b>Baseline (SD)</b> | <b>26 Weeks (SD)</b> | <b>p-level</b>    |
|----------------------------------------------------------------|----------------------|----------------------|-------------------|
| #Falls (pre-6 mo & in study, n=44)                             | 53                   | 39                   | n/a               |
| Fall Rate Mean (#/1000 patient days, pre-6mo & in study, n=44) | 6.7 (7.7)            | 4.8 (7.7)            | n/a               |
| Fall Rate Median                                               | 5.6                  | 0                    | <b>0.044*</b>     |
| #Fallers (pre-6mo & at 6mo in study, n=44)                     | 25                   | 20                   | 0.28              |
| Falls no treatment sought                                      | n/a                  | 31                   | n/a               |
| Falls treatment sought + severe injury                         | n/a                  | 4+4                  | n/a               |
| <b>Pre-Fallers (n=25)</b>                                      |                      |                      |                   |
| #Falls (pre-6 mo & in study, n=25)                             | 53                   | 31                   | n/a               |
| Fall Rate Mean (#/1000 patient days, pre-6mo & in study, n=25) | 11.8 (6.7)           | 6.7 (9.5)            | n/a               |
| Fall Rate Median                                               | 11.1                 | 5.0                  | <b>0.0043*</b>    |
| #Fallers (pre-6mo & at 6mo in study, n=25)                     | 25                   | 13                   | <b>&lt;0.0001</b> |
| Falls no treatment sought                                      | n/a                  | 25                   | n/a               |
| Falls treatment sought + severe injury                         | n/a                  | 3+3                  | n/a               |
| <b>Pre-NonFallers (n=19)</b>                                   |                      |                      |                   |
| #Falls (pre-6 mo & in study, n=19)                             | 0                    | 8                    | n/a               |
| Fall Rate Mean (#/1000 patient days, pre-6mo & in study, n=19) | 0 (0)                | 2.3 (3.3)            | n/a               |
| Fall Rate Median                                               | 0                    | 0                    | <b>0.023*</b>     |
| #Fallers (pre-6mo & at 6mo in study, n=19)                     | 0                    | 7                    | <b>&lt;0.0001</b> |
| Falls no treatment sought                                      | n/a                  | 6                    | n/a               |
| Falls treatment sought + severe injury                         | n/a                  | 1+1                  | n/a               |

1032  
 1033  
 1034  
 1035  
 1036  
 1037  
 1038  
 1039

## Extended Effects of a Wearable Sensory Prosthesis

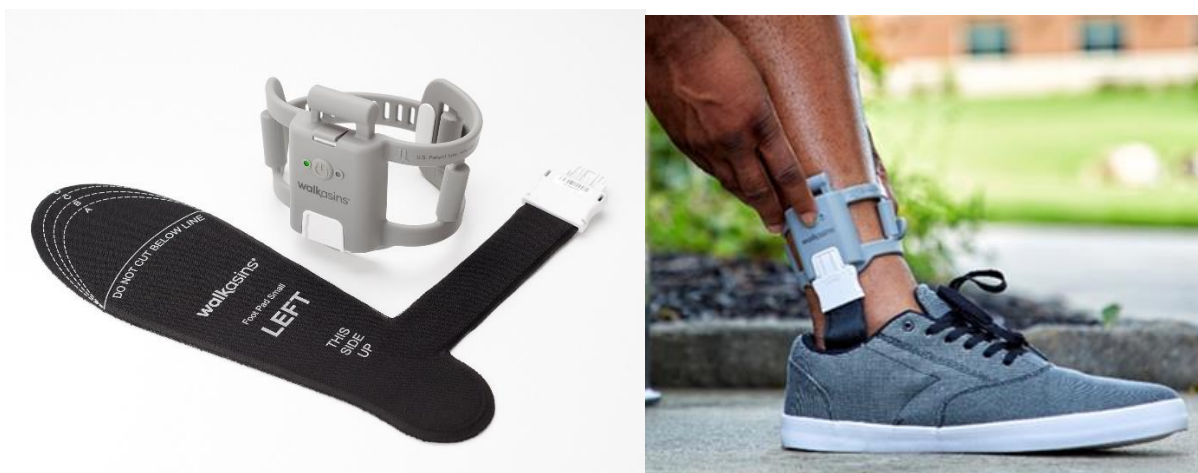

1040  
1041  
1042 *Figure 1. (Left) The two components of the Walkasins device, the pressure sensitive flexible foot pad that is placed in the*  
1043 *shoe and connects to the leg unit that contains a rechargeable battery, a microprocessor, supporting electronics, and four*  
1044 *tactile stimulators. The embedded software algorithm evaluates pressure data and activates tactile stimulators at relevant*  
1045 *times during standing and walking to signal balance-related information to the afferent nervous system. (Right) A*  
1046 *Walkasins user wearing the device in the process of turning it on. The Walkasins system is worn bilaterally (unilateral*  
1047 *components depicted).*

1048  
1049  
1050  
1051  
1052  
1053  
1054  
1055



## Extended Effects of a Wearable Sensory Prosthesis

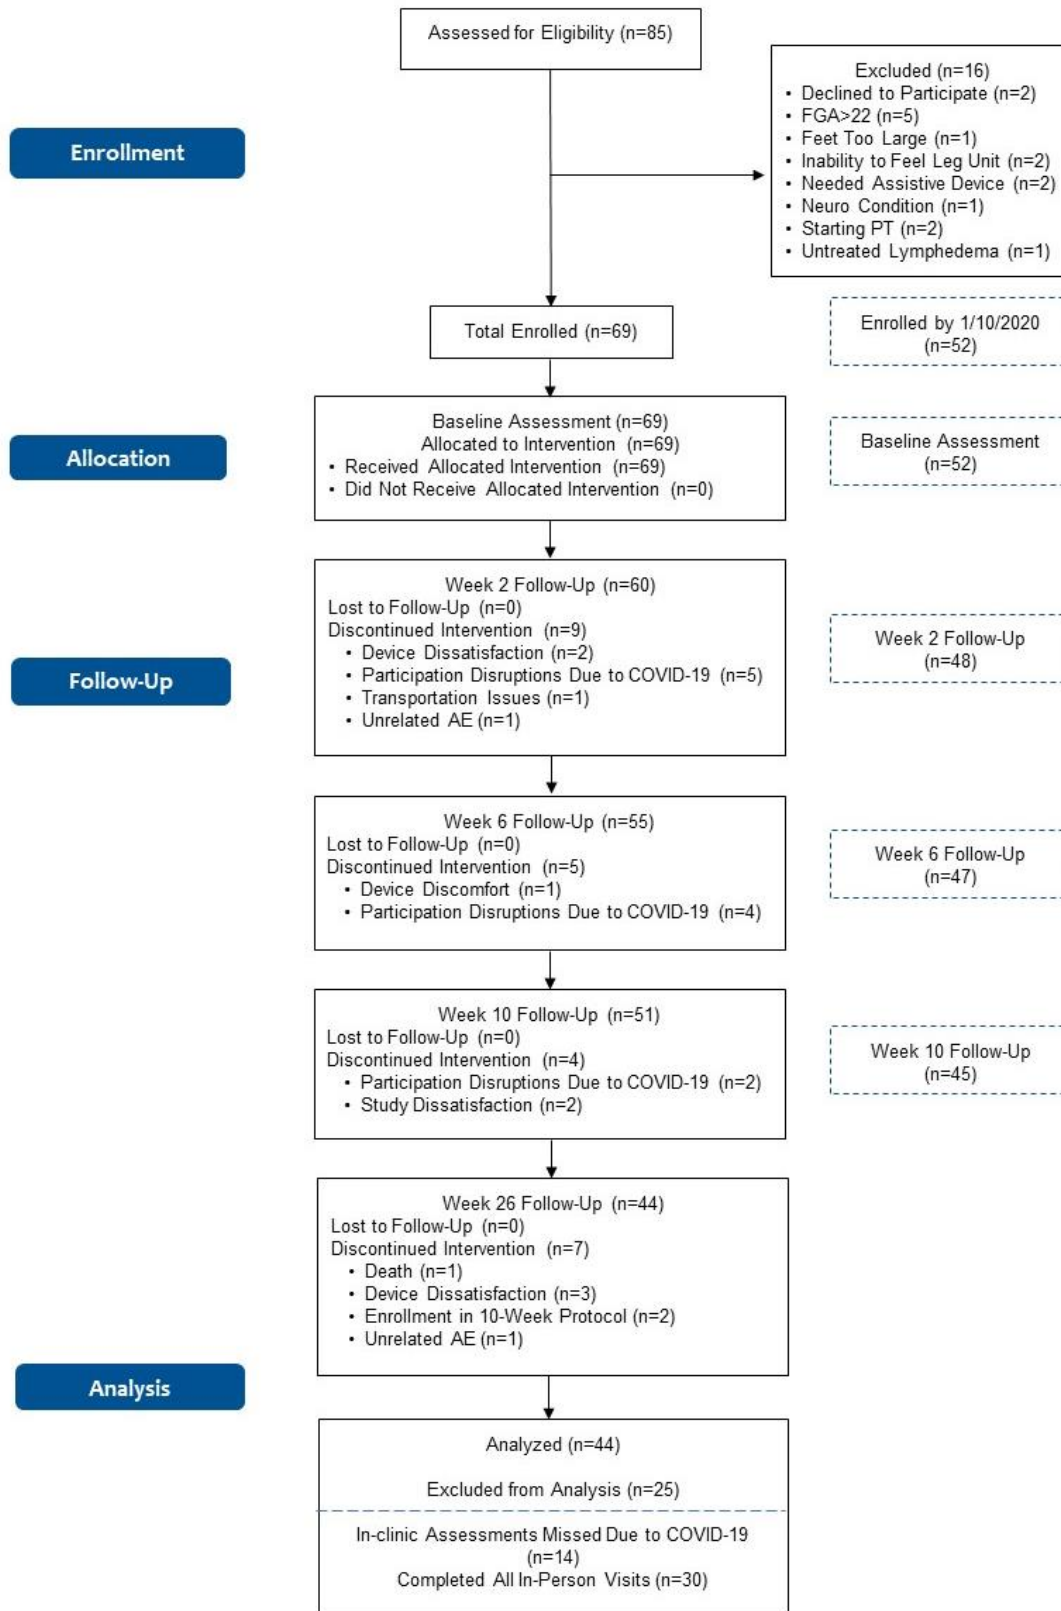

1056

1057

1058

1059

1060

Figure 2. Flowchart of the walk2Wellness trial. Data for the primary endpoint at 10 weeks, shown to the right for reference, were published earlier (Oddsson, Bisson et al. 2020). Due to COVID-19 site lockdowns, in-person outcomes could be assessed from 30 of the 44 participants. Self-reported outcomes and fall events were assessed from all 44 participants who reached the 26-week follow-up visit.

## Extended Effects of a Wearable Sensory Prosthesis

1061  
1062

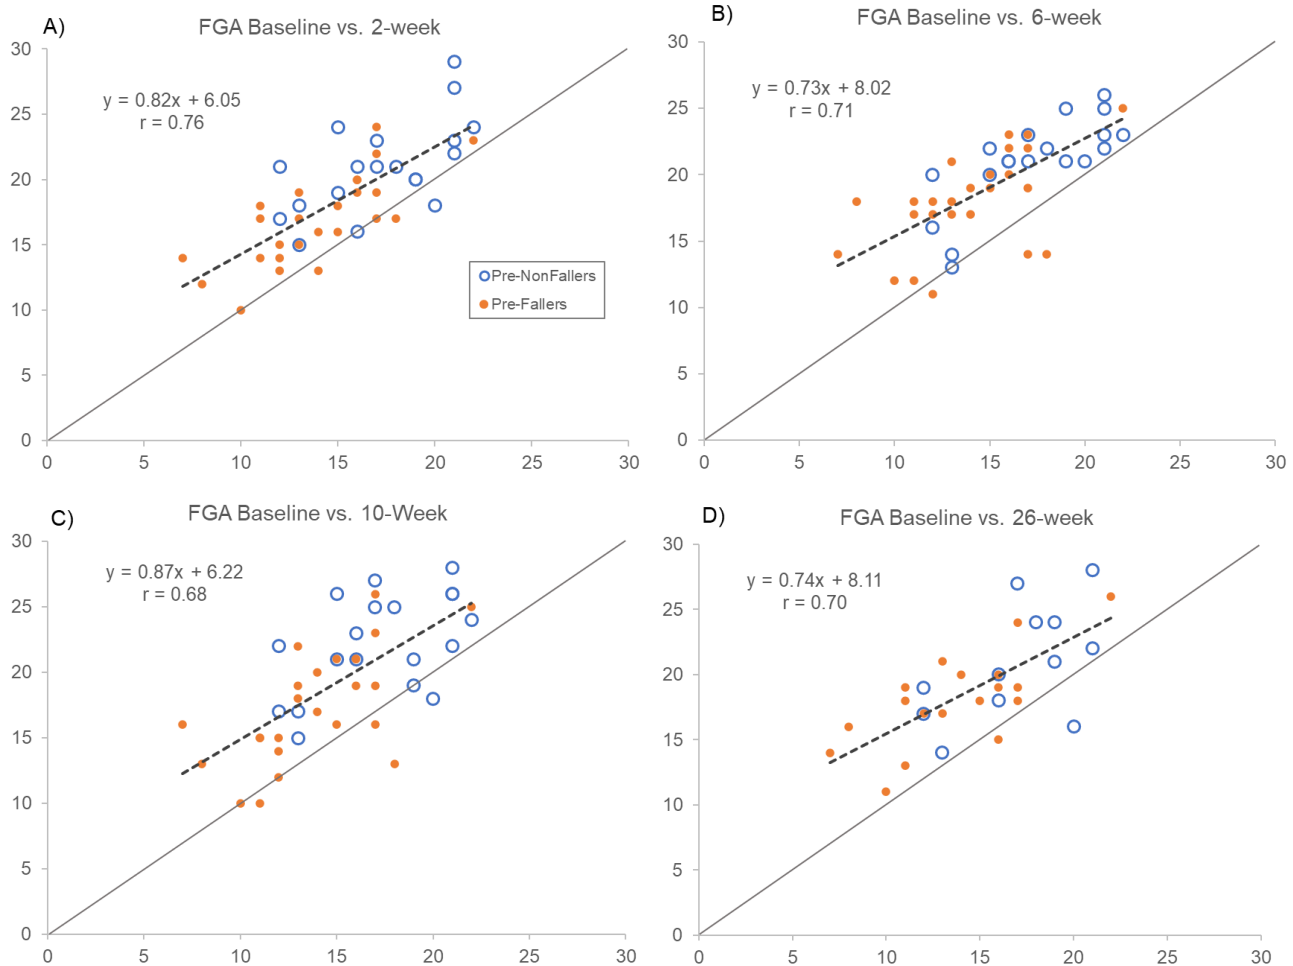

1063

1064  
1065  
1066  
1067  
1068  
1069  
1070  
1071  
1072

Figure 3. Comparing FGA scores at baseline (horizontal axes) with assessments after 2, 6, 10, and 26 weeks (vertical axes) of device use. Open symbols represent pre-study non-fallers and filled ones are pre-study fallers. Dashed lines show regression line for the whole group. Forty-four participants completed in clinic outcomes testing up to 10 weeks (primary endpoint), and 30 participants completed the 26-week assessment in person. Scores above line of equality indicate improvements and below a decrement in FGA score compared to baseline scores. Notice that regression line slopes are less than 1 indicating slightly larger improvements in FGA score for those with lower baseline scores. Overall, improvements observed after 2 weeks of use appeared sustained throughout the 26 weeks of use.

1073  
1074  
1075  
1076  
1077  
1078  
1079  
1080  
1081  
1082

## Extended Effects of a Wearable Sensory Prosthesis

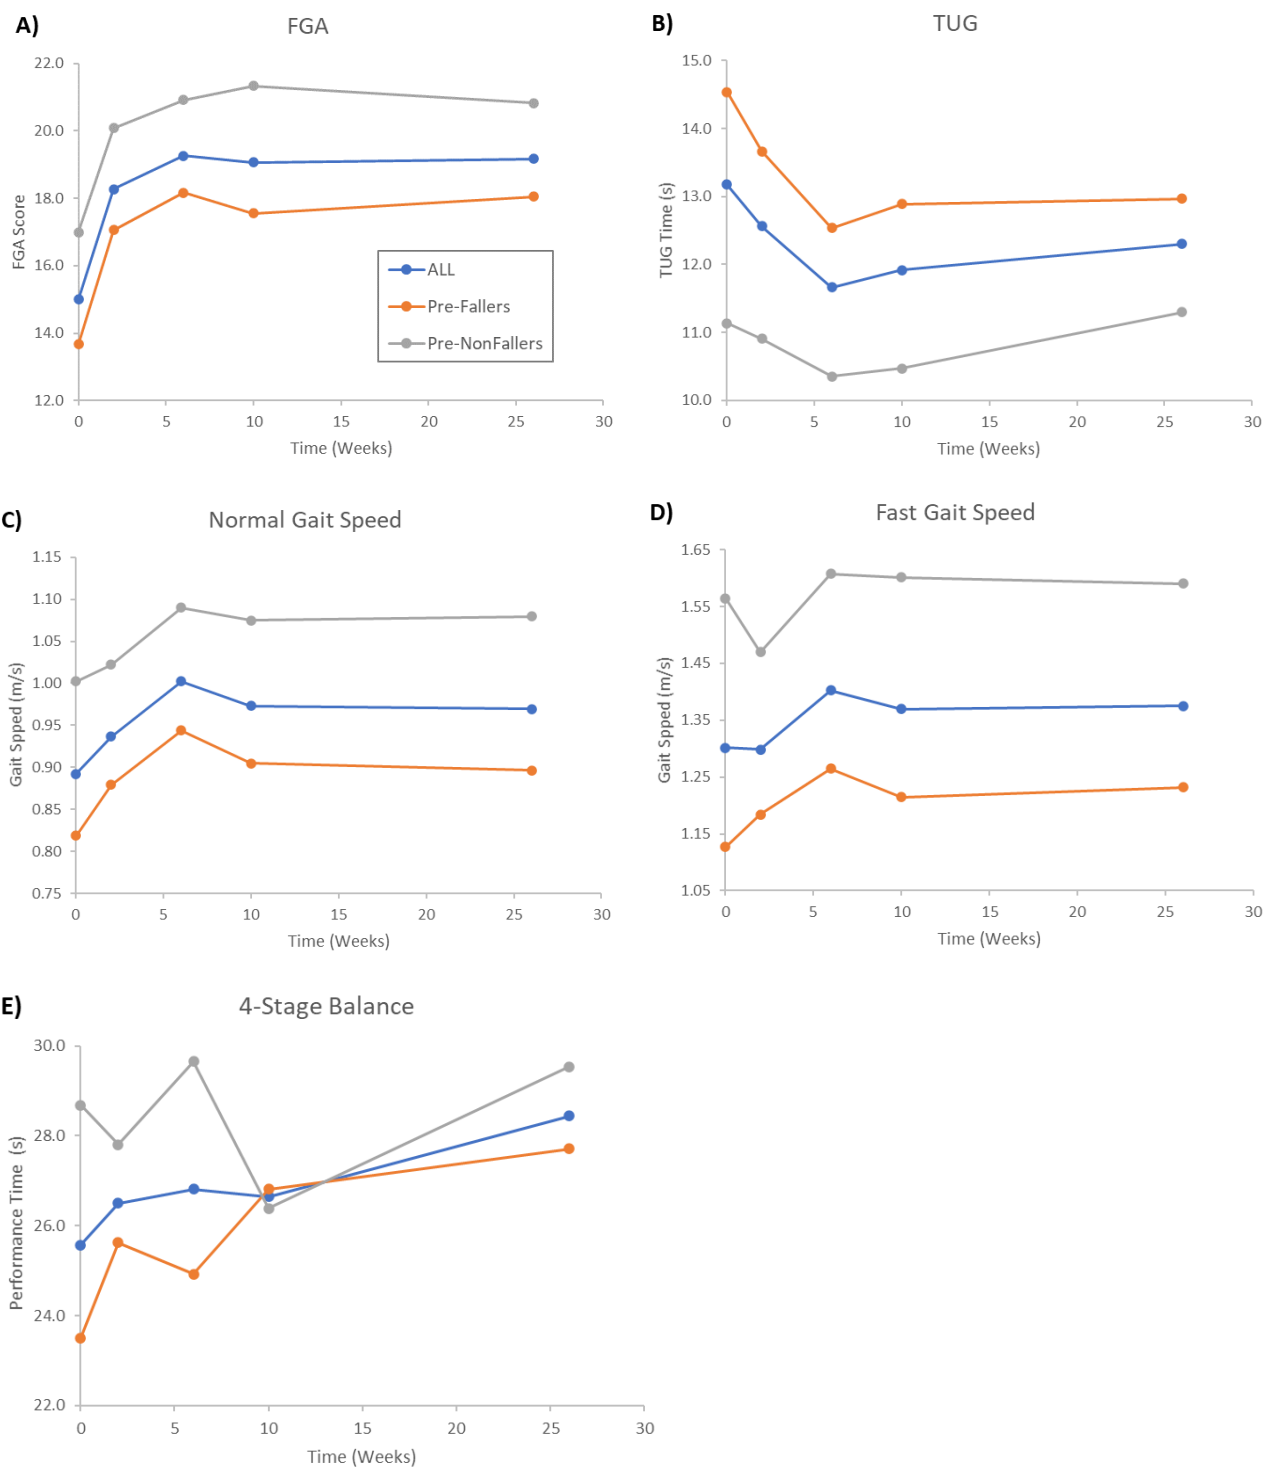

1083

1084

1085

1086

1087 *Figure 4. Averages of clinical outcomes across the in-person assessments at baseline (0), 2, 6, 10, and 26 weeks for the*  
 1088 *30 participants (blue lines and symbols) who were able to be tested in clinic after 26 weeks of device use. Grey symbols*  
 1089 *and lines represent the pre-study non-fallers (n=12 of 30,) and orange lines and symbols represent pre-study fallers*  
 1090 *(n=18 of 30). Notice that most improvements appeared to peak after 6-10 weeks of device use, followed by a leveling off*  
 1091 *until 26 weeks.*

1092

1093

## Extended Effects of a Wearable Sensory Prosthesis

1094  
1095  
1096  
1097

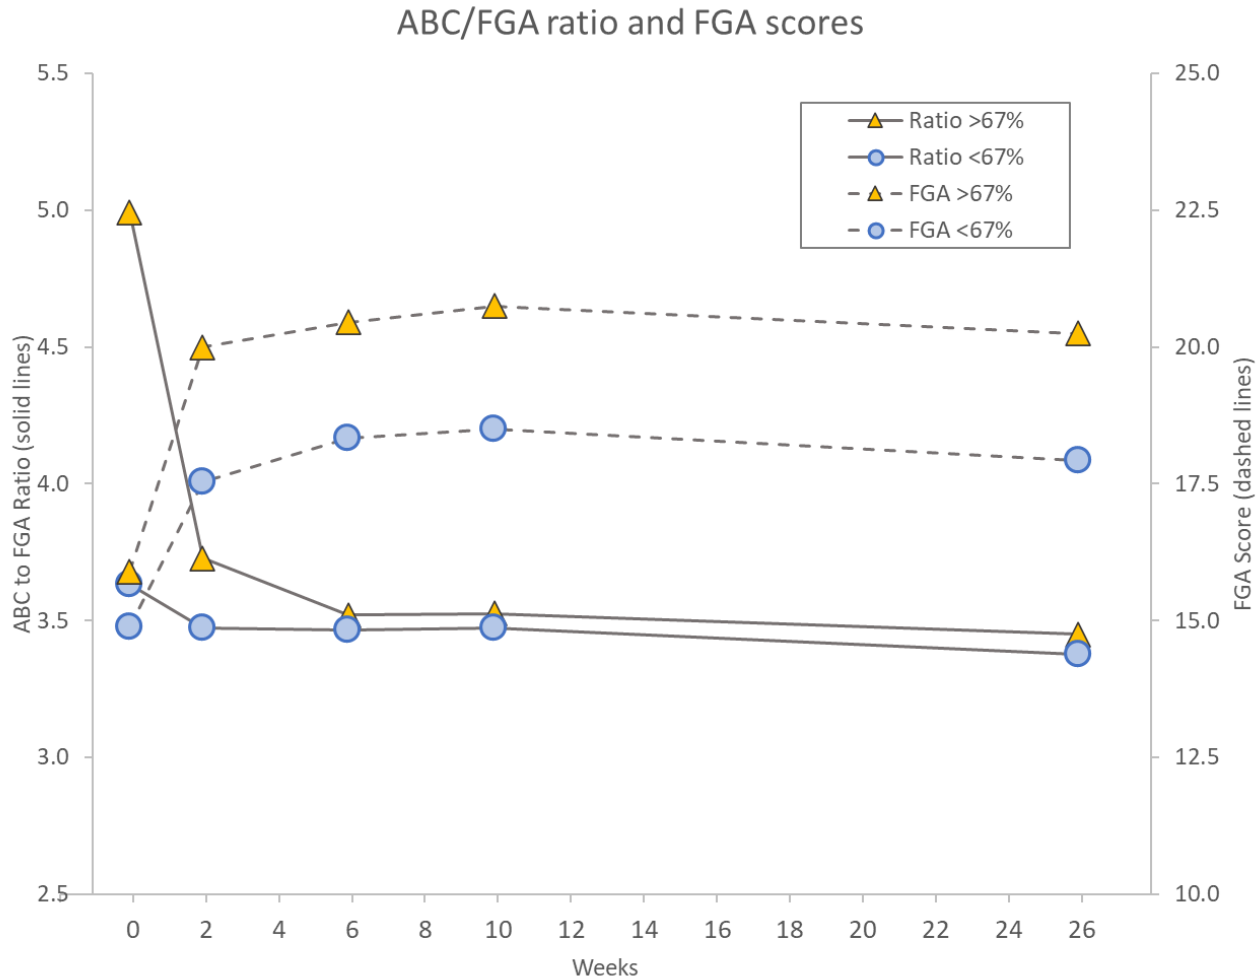

1098  
1099 *Figure 5. Illustration of changes in ABC/FGA ratio (left axis, solid lines), an indication of self-perceived balance*  
1100 *confidence in relation to externally observed gait function performance, for participants with baseline ABC scores >67%*  
1101 *(high balance-confidence, orange triangles) and those with ABC scores  $\leq$ 67% (low balance-confidence, blue circles).*  
1102 *The associated changes over time in FGA scores for the same two groups are also shown (right axis, dashed lines).*  
1103 *Notice that both groups had similar FGA scores at baseline, which led to a dramatic difference in the ABC/FGA ratio at*  
1104 *baseline. Over time, the ratio for the high balance-confidence participants gradually decreased and aligned with the low*  
1105 *balance-confidence group at  $\sim$ 3.5, mainly due to an increased FGA score and a maintained ABC score. The low balance-*  
1106 *confidence group maintained an ABC/FGA ratio  $\sim$ 3.5 throughout the 26 weeks associated with a proportional increase in*  
1107 *ABC and FGA scores. Interestingly, the high balance-confidence group showed a higher increase in FGA score than the*  
1108 *low balance-confidence group.*

1109  
1110  
1111  
1112  
1113  
1114

## Extended Effects of a Wearable Sensory Prosthesis

1115

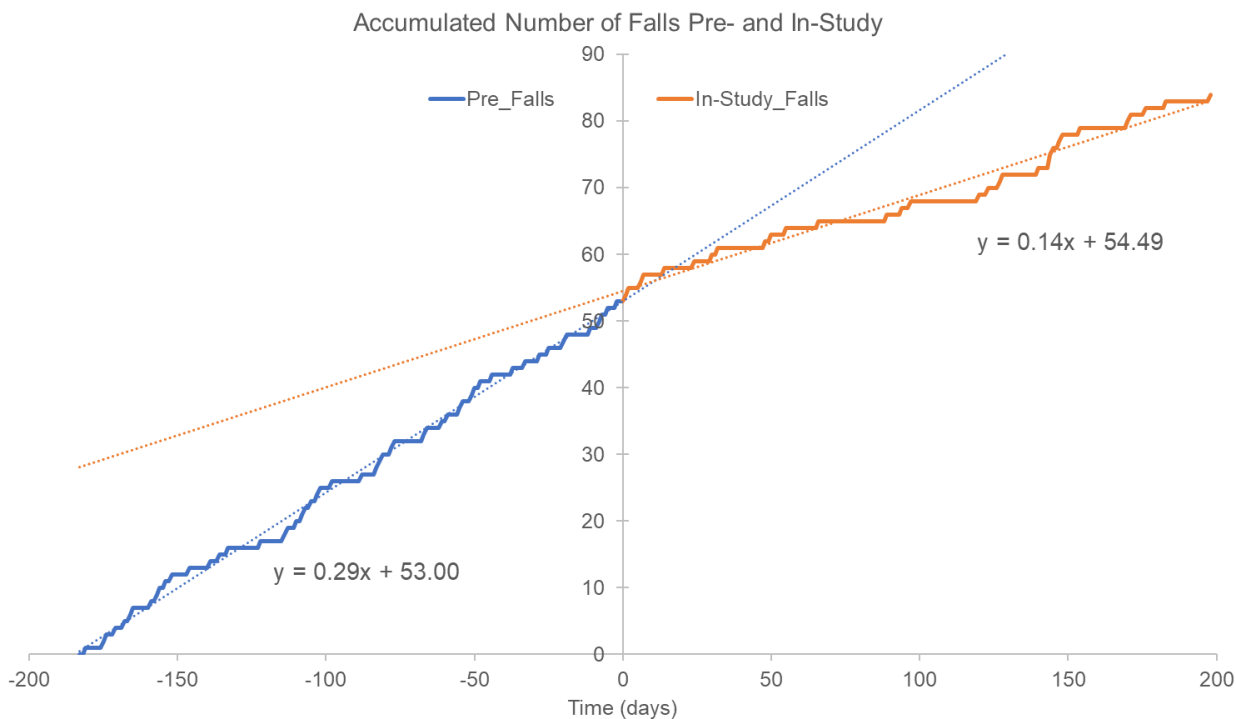

1116

1117

1118

1119

1120

1121

1122

1123

1124

Figure 6. Accumulated number of falls reported six months pre-study (blue trace and blue dotted linear regression line) and falls documented in-study (orange trace and orange dotted regression line). The 53 falls reported for the prior six months would correspond to 0.29 falls/day (53/180~0.29), which represents the slope of the regression line (blue trace). For illustration purposes, the 53 pre-study falls were randomly distributed across the six months since their exact time occurrence was unknown. In-study falls are shown as they occurred and were reported by participants throughout the 26 weeks. Notice how the rate of in-study falls appear to begin deviating from pre-study fall rate (slope of dotted blue line) after approximately 20 days of device use.

1125

1126

1127

1128

1129

1130
